# Supplementary material
Source: PubMed Central journal article supplement (PMC3174590)
Supplement: 1105100108_sfig01.pdf [file 1105100108_sfig01.pdf]

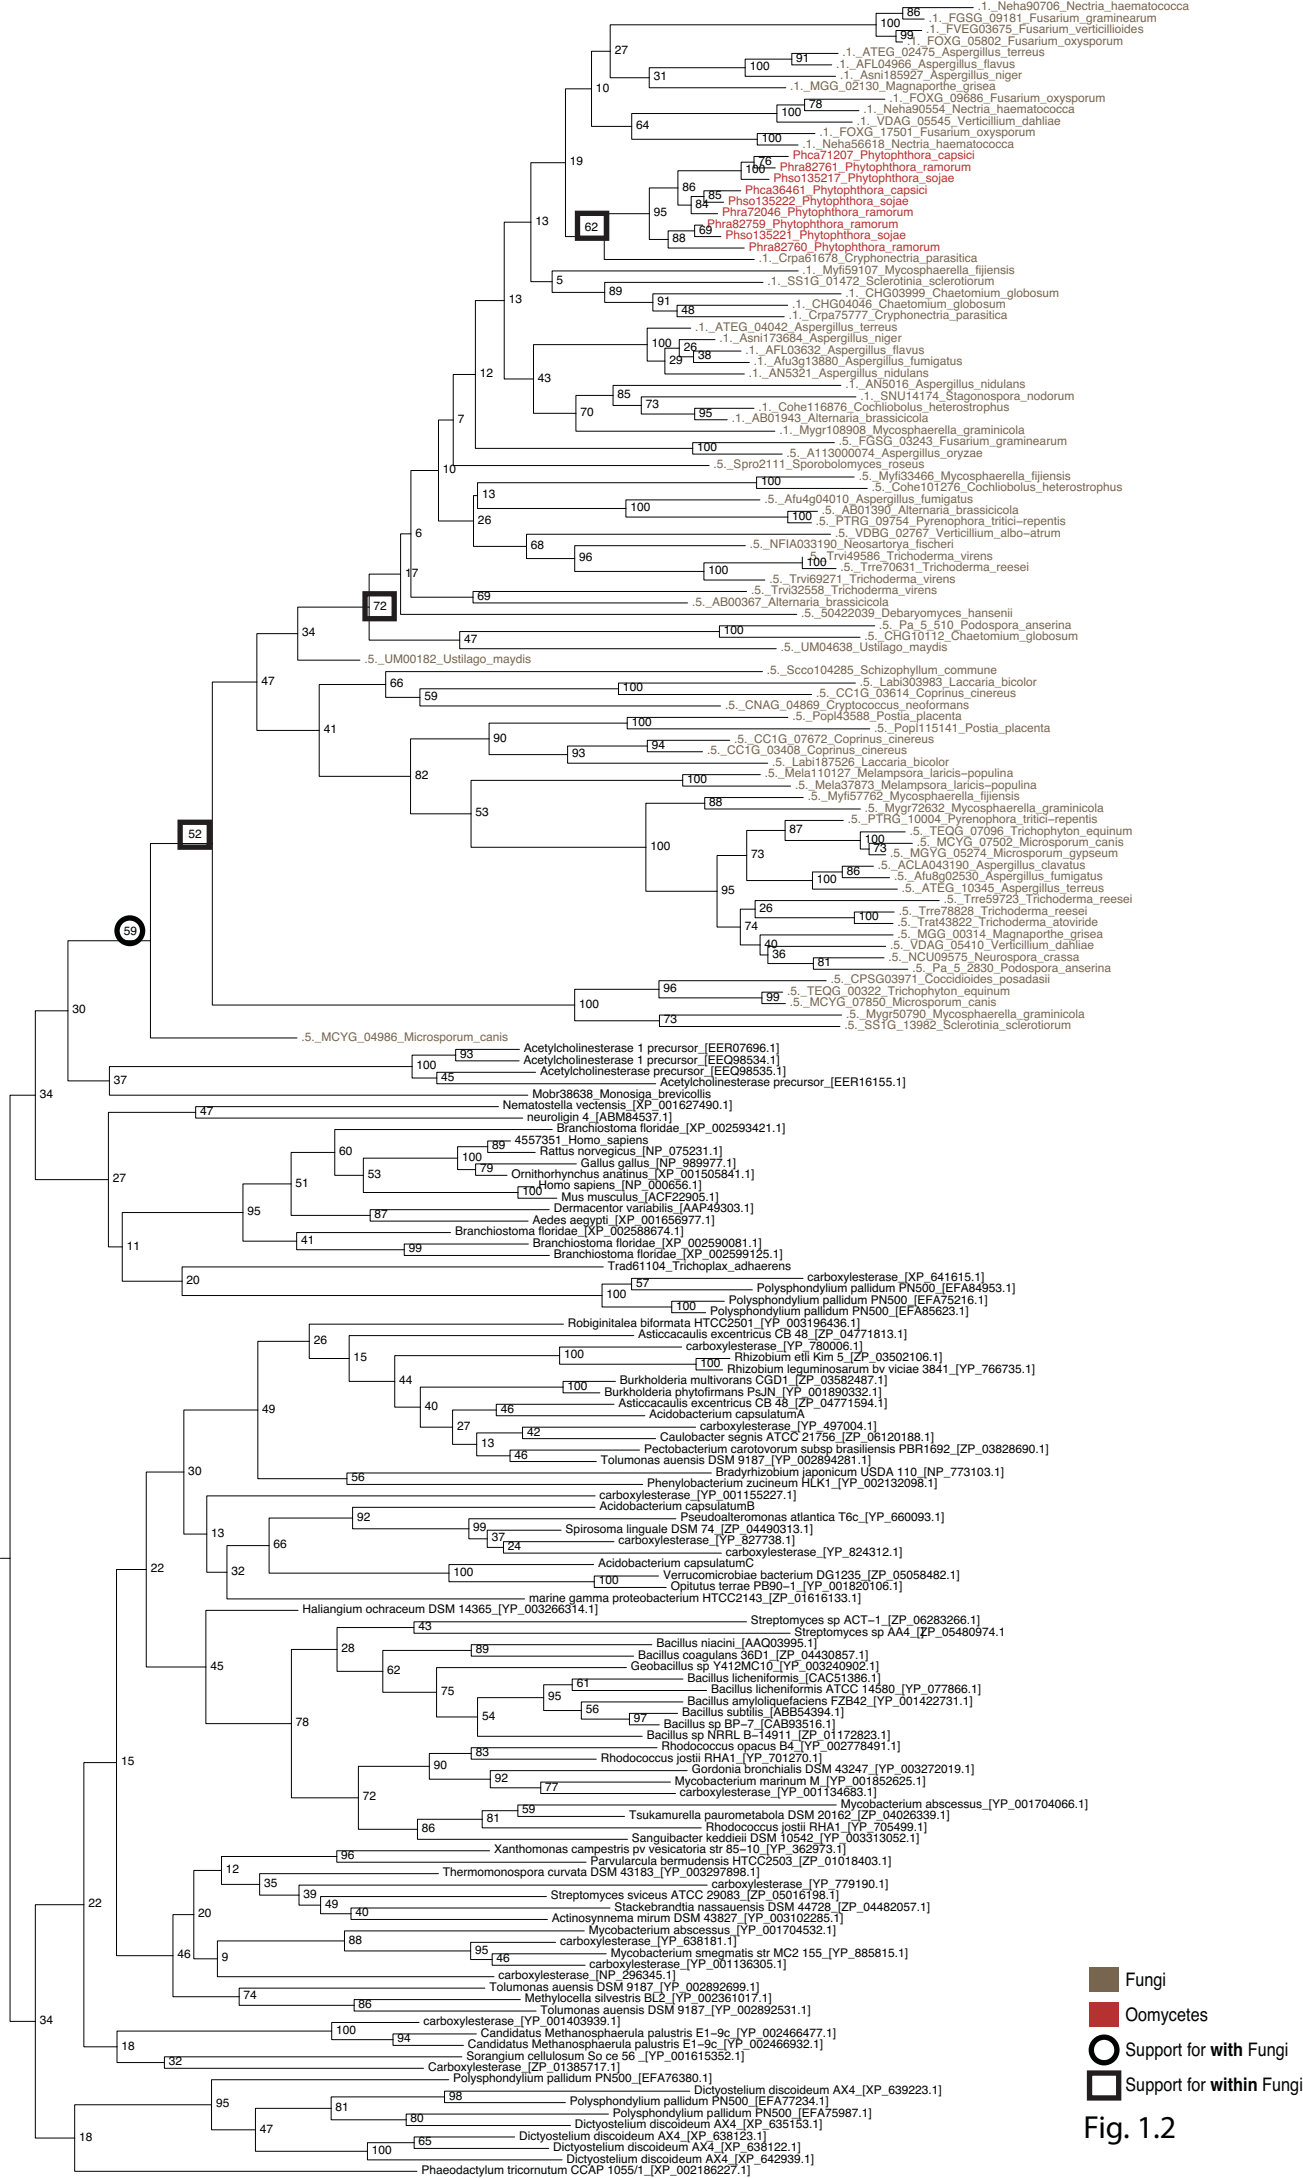

Fig. 1.2

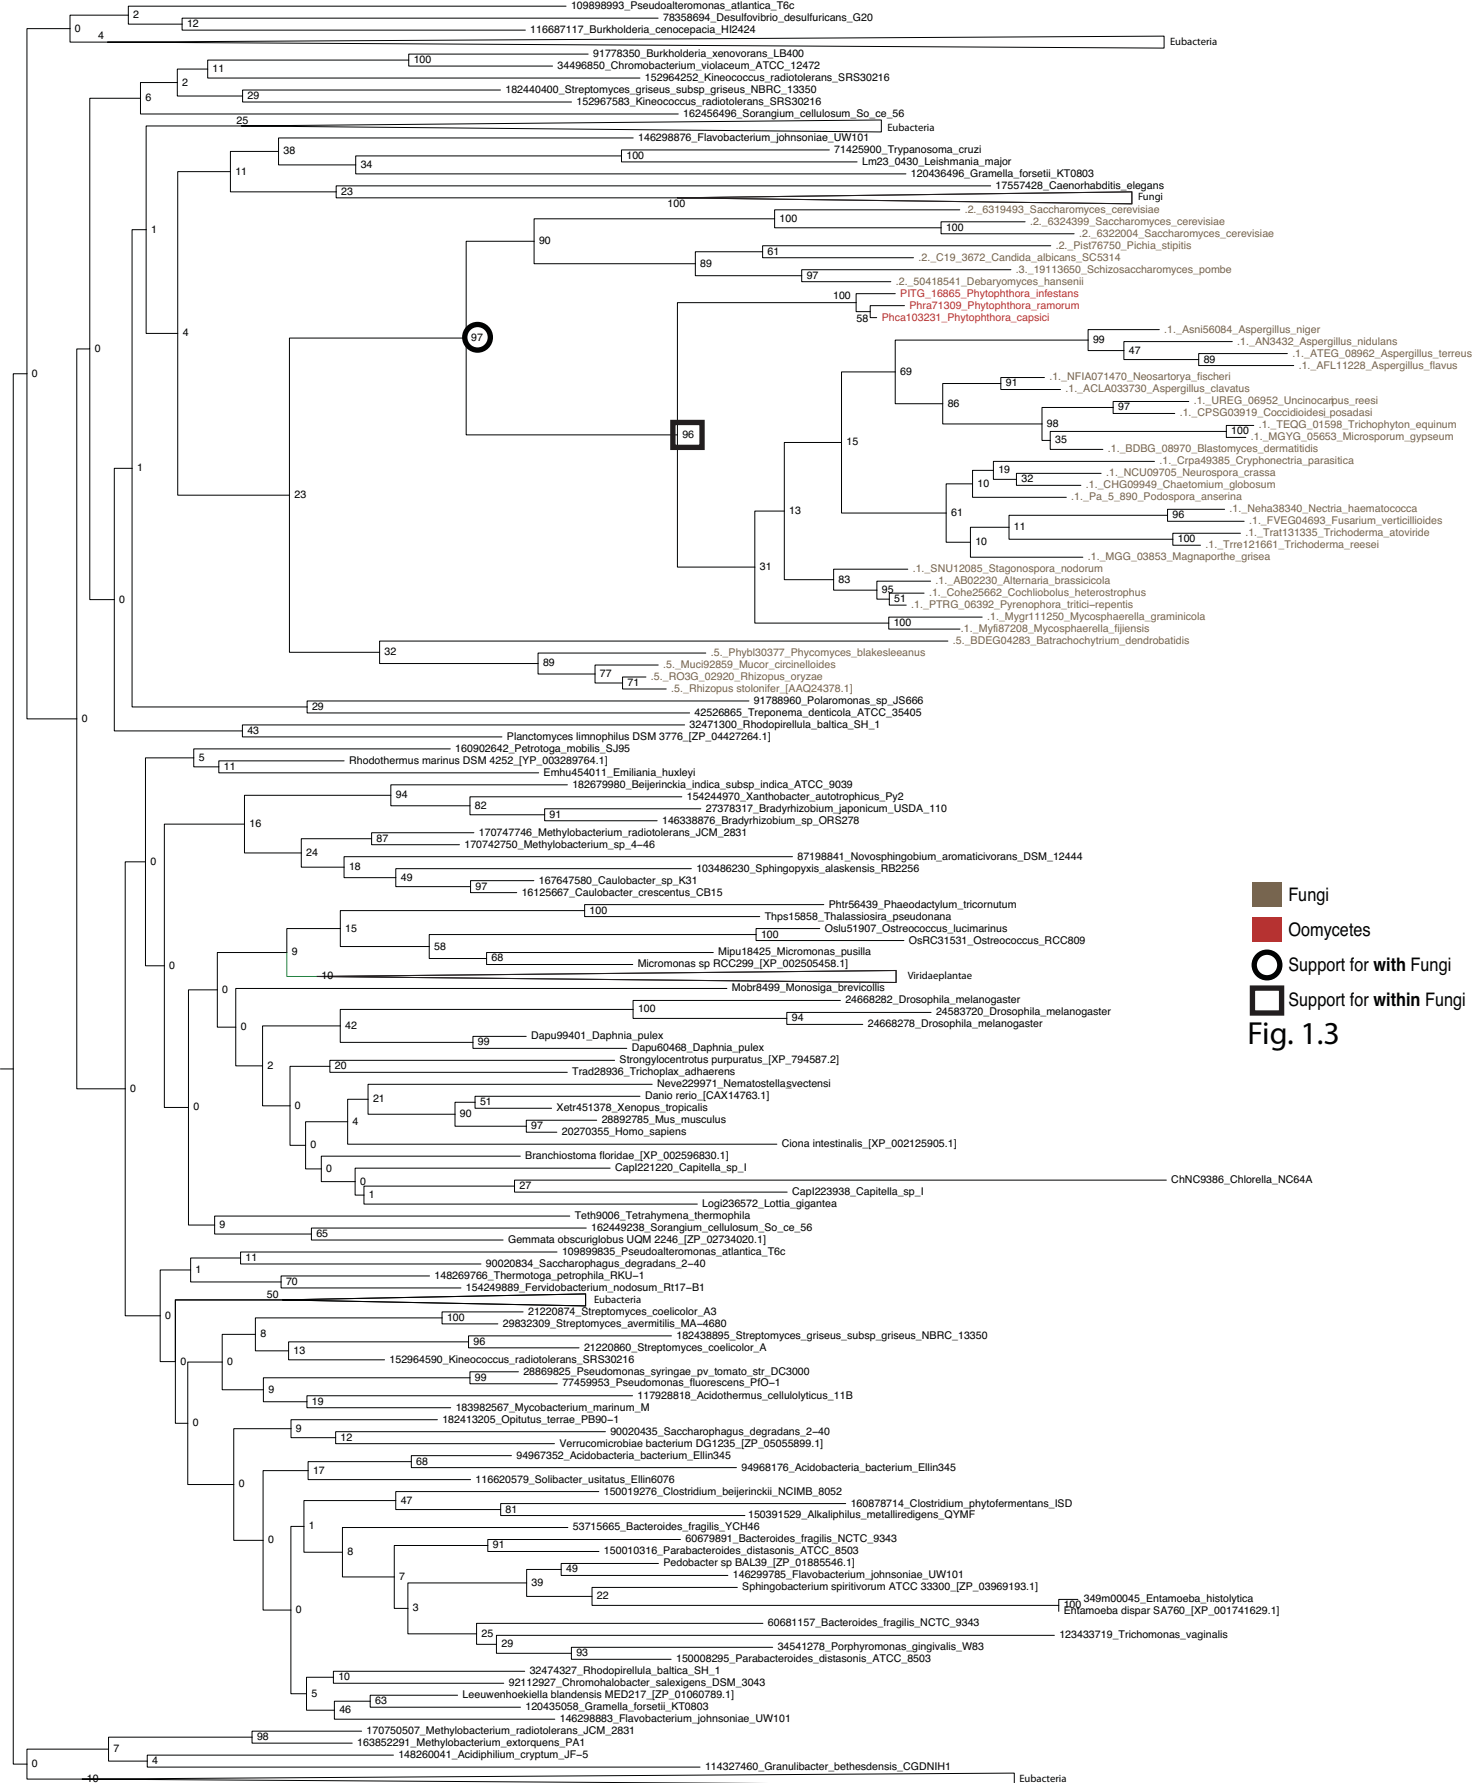

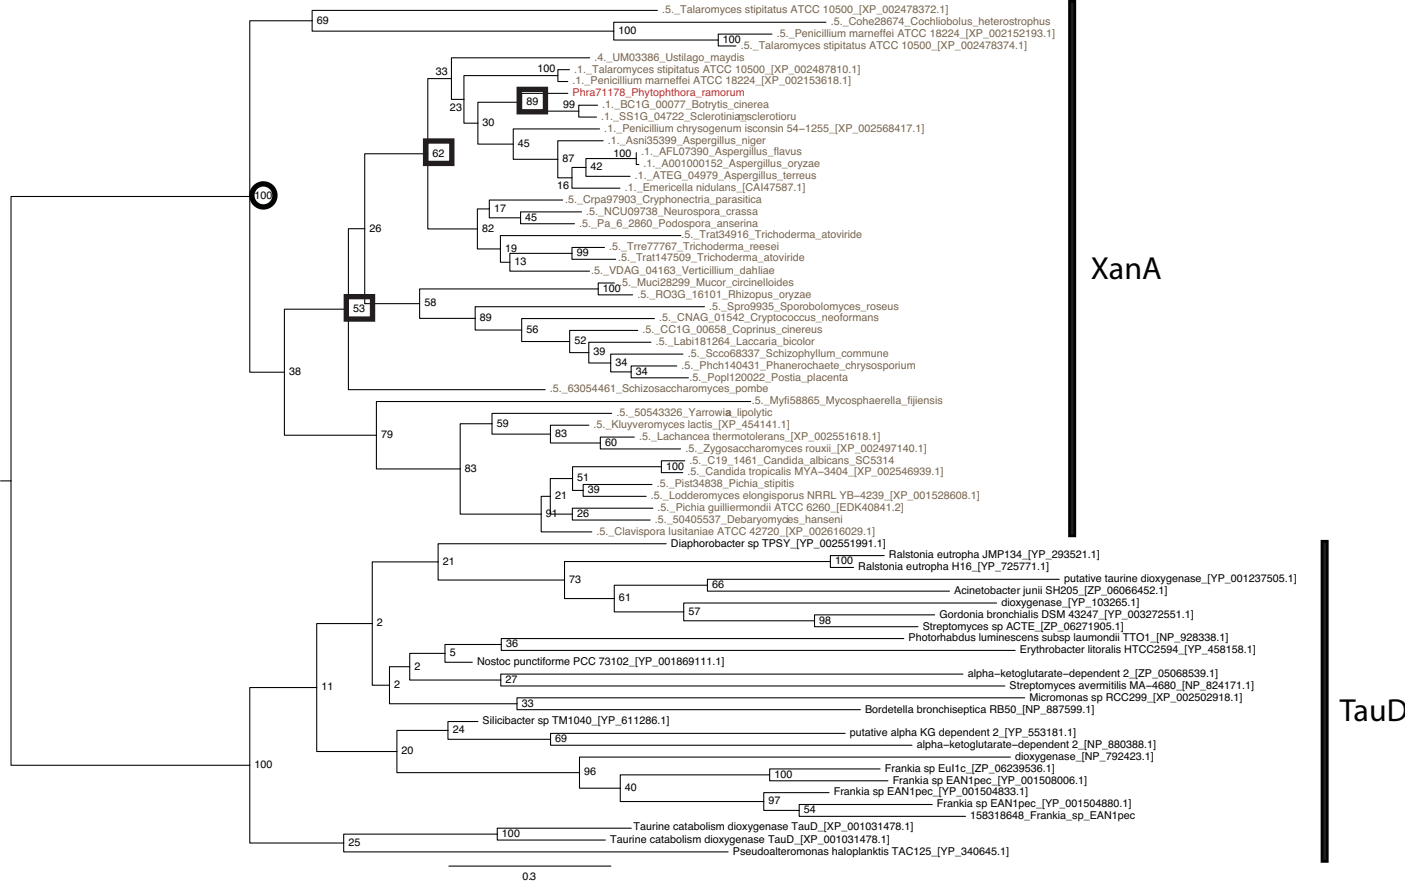

XanA

TauD

- Fungi
- Oomycetes
- Support for with Fungi
- Support for within Fungi

Fig. 1.4

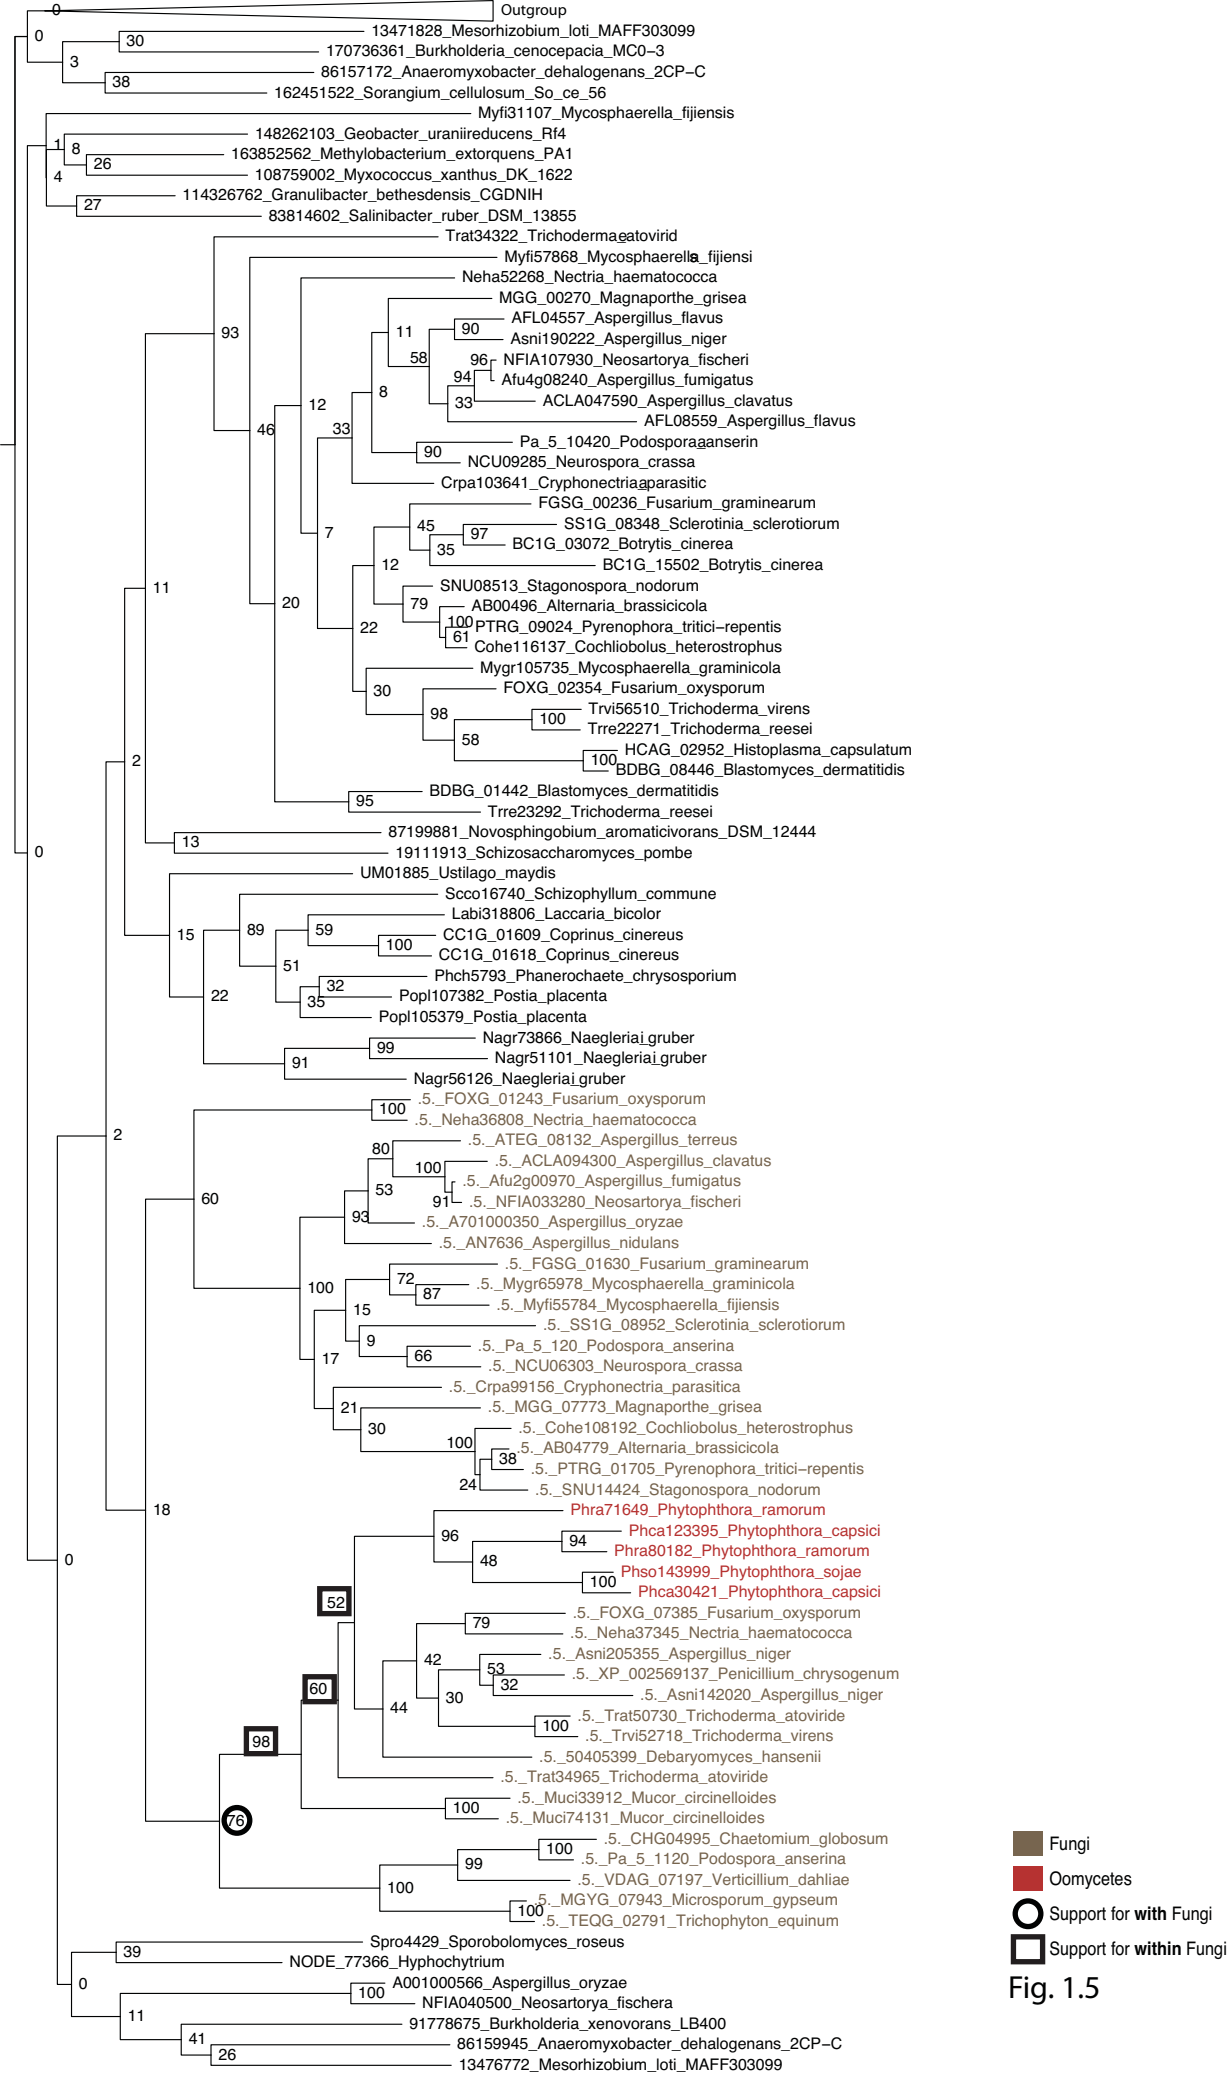

Fig. 1.5

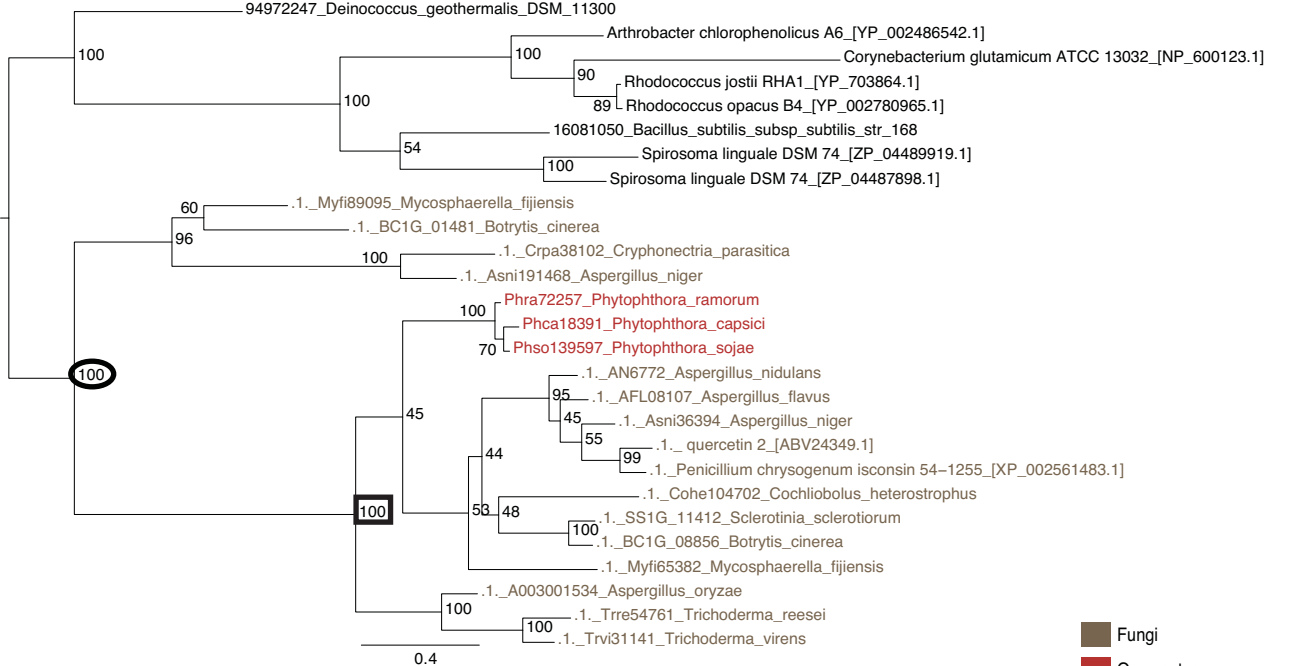

Fig. 1.6

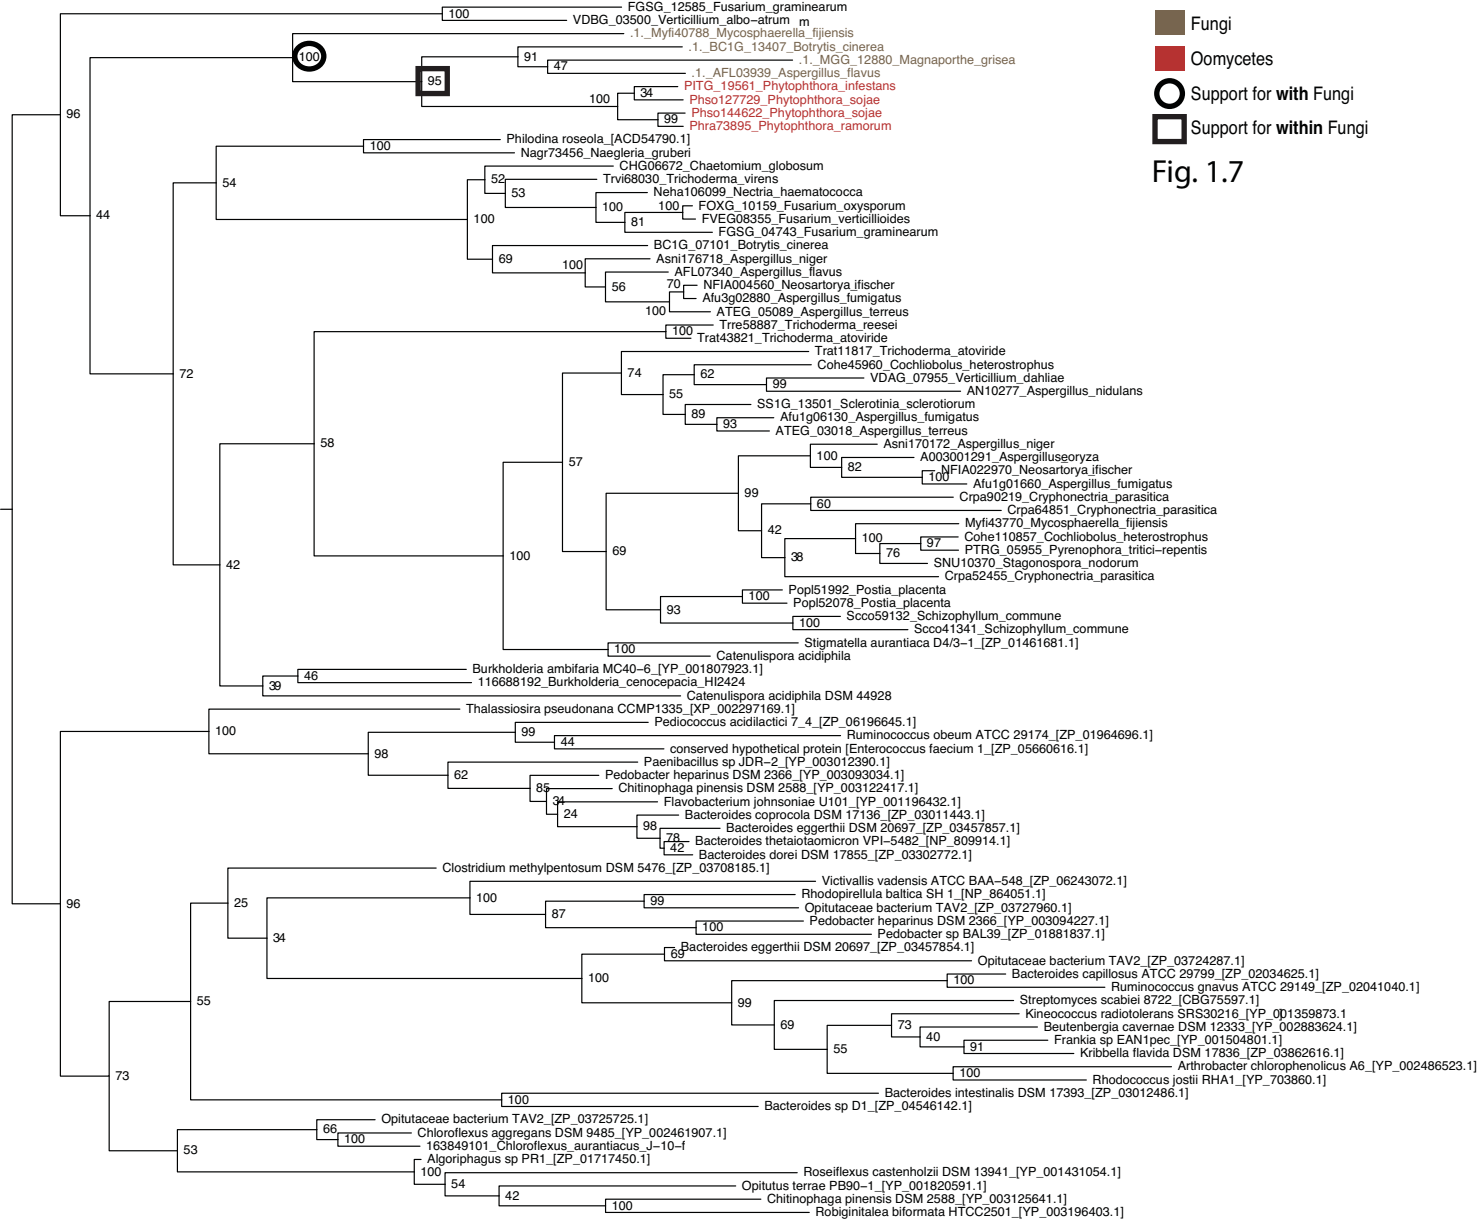

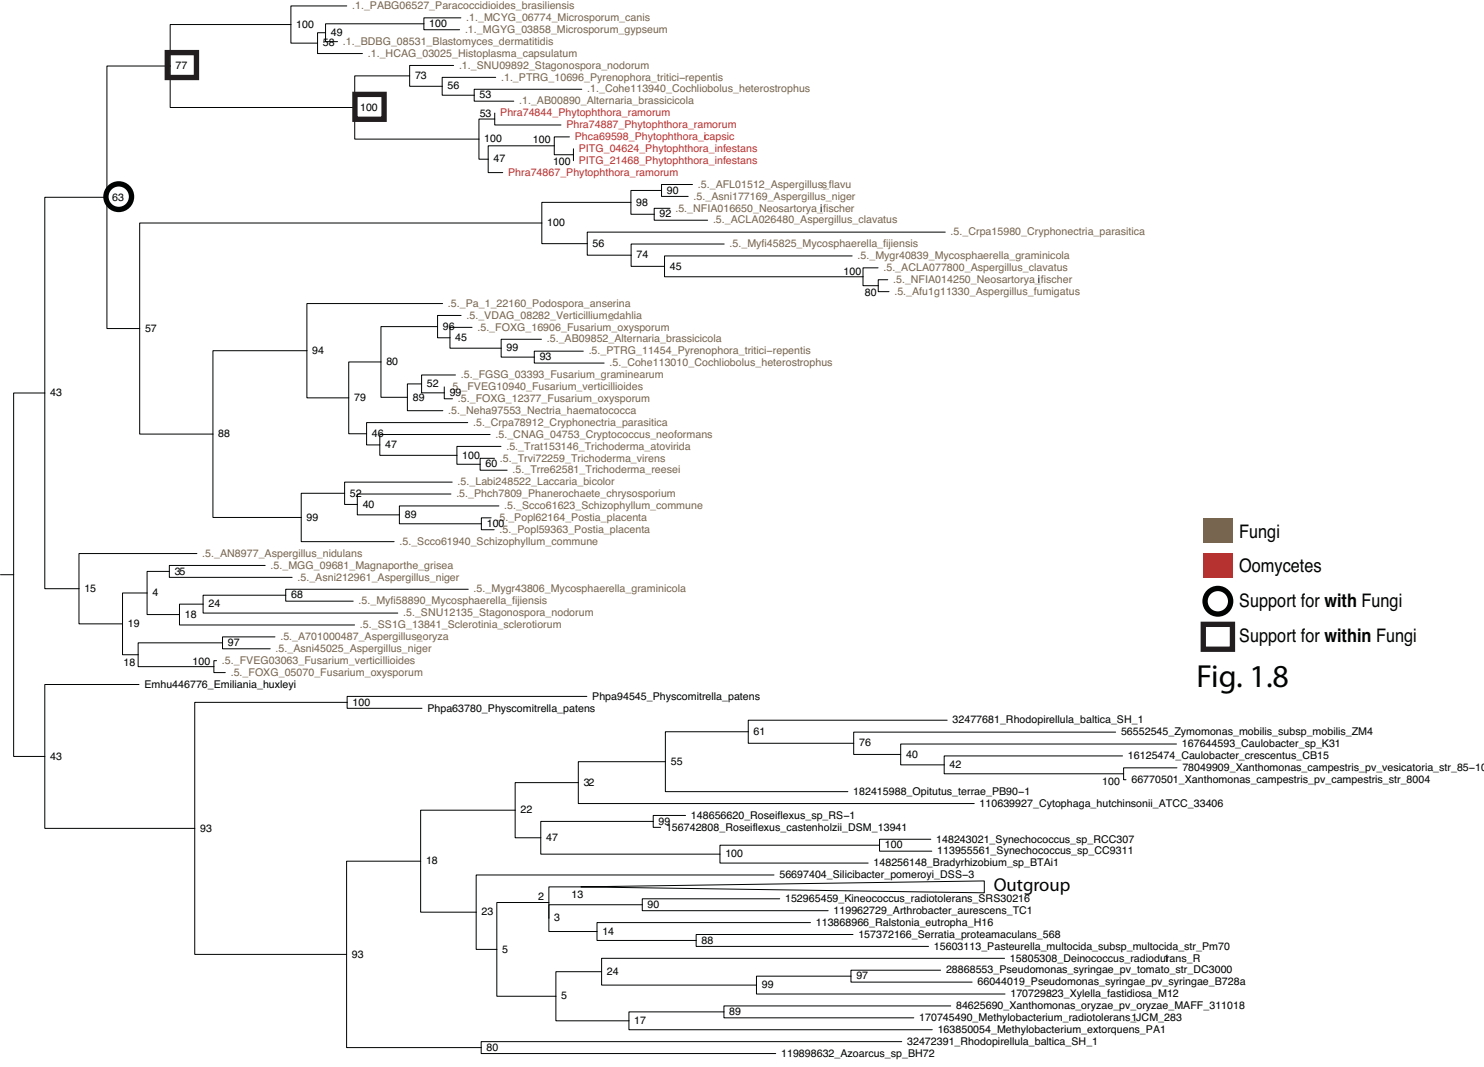



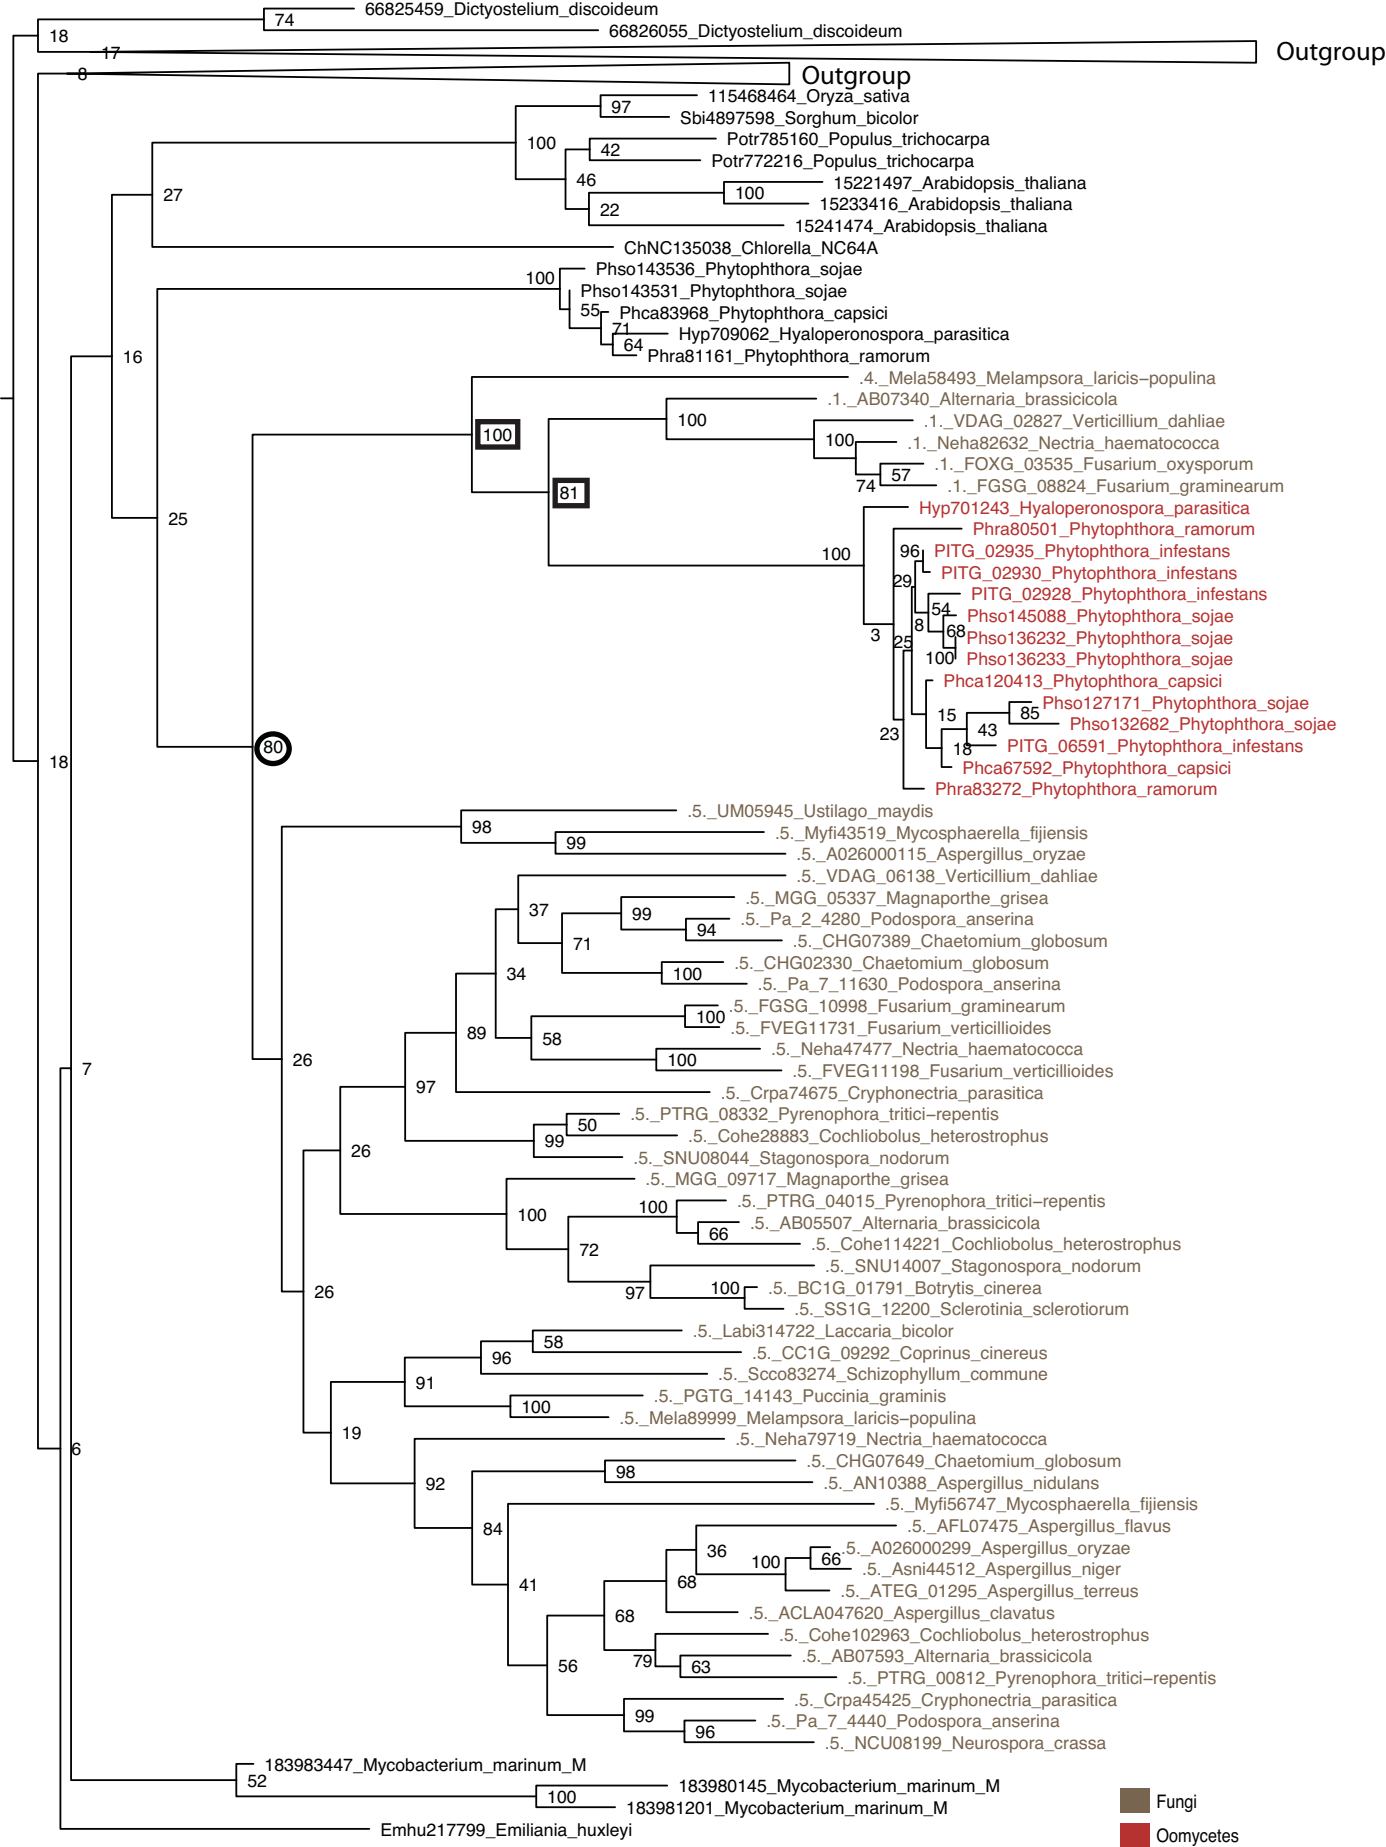

Fig. 1.9

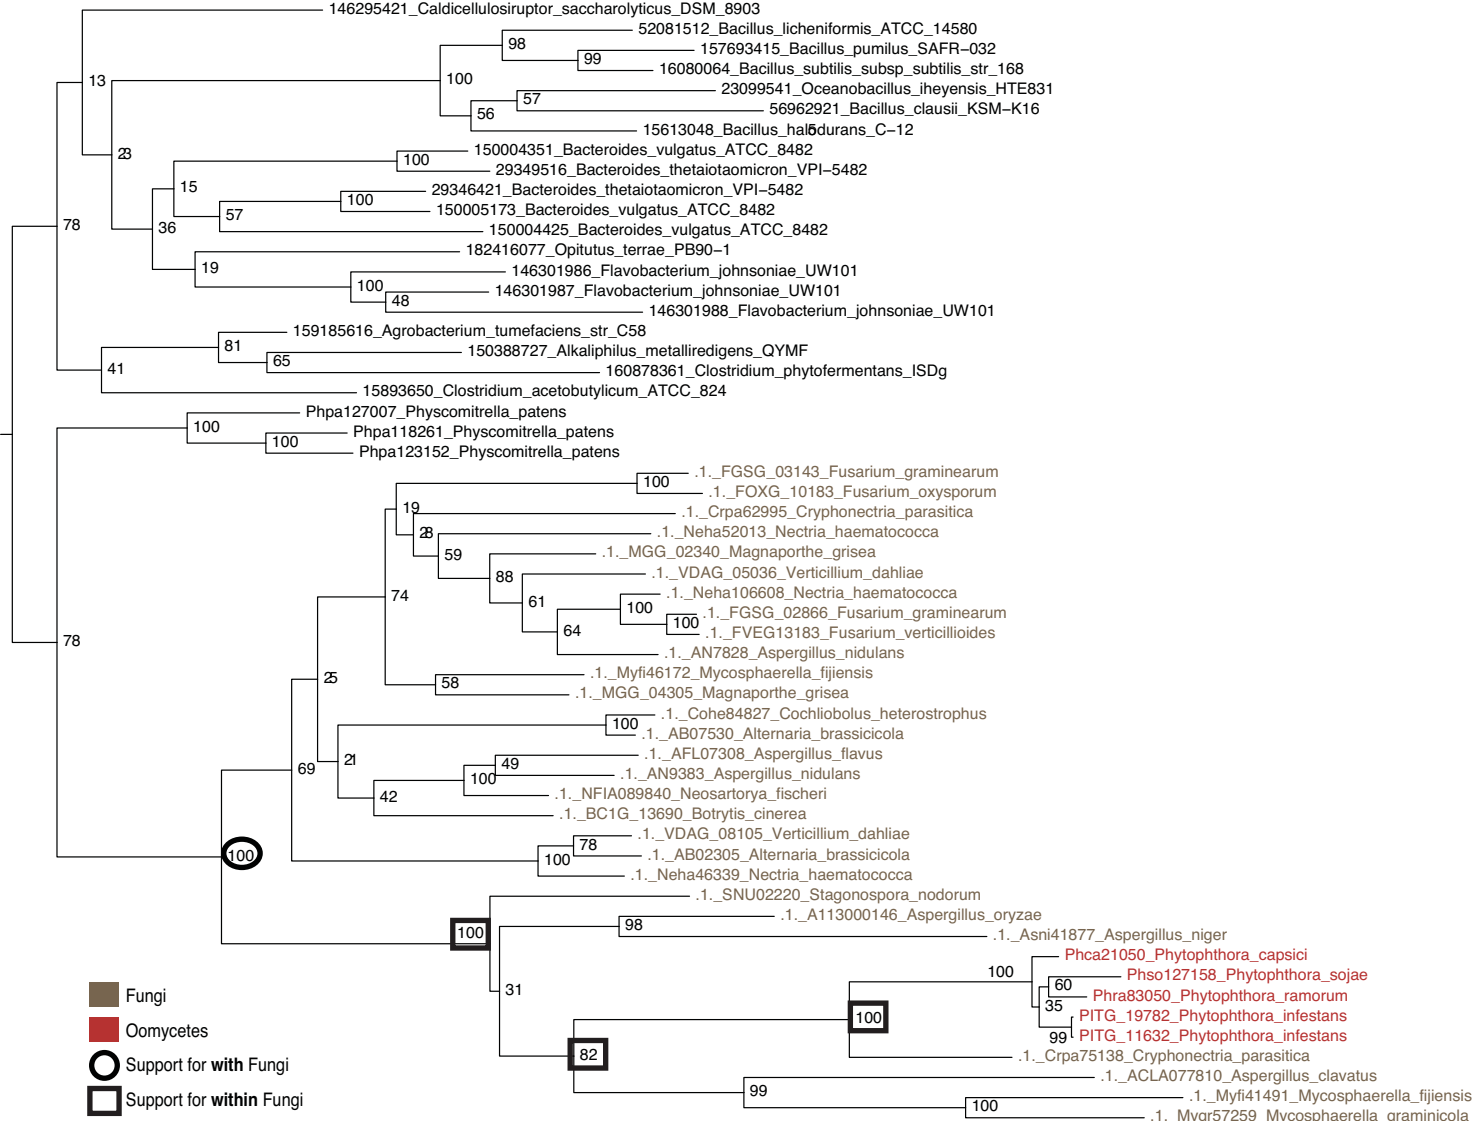

Fig. 1.10

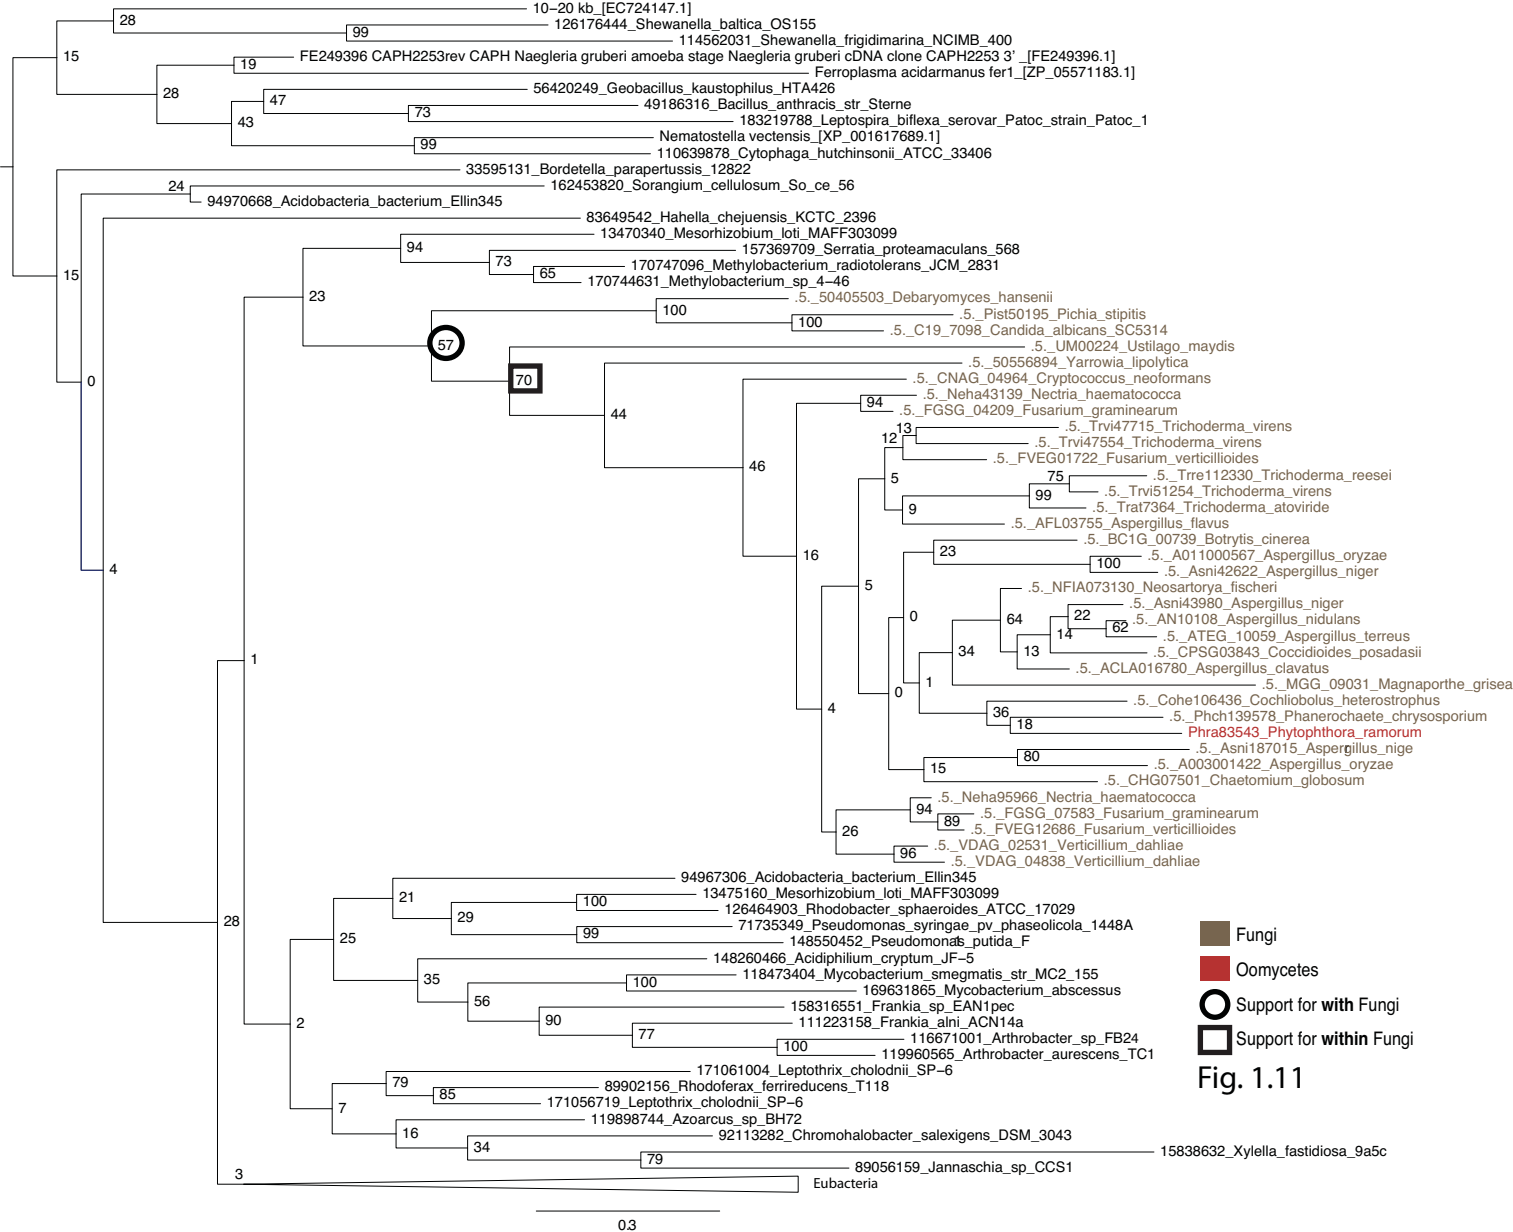

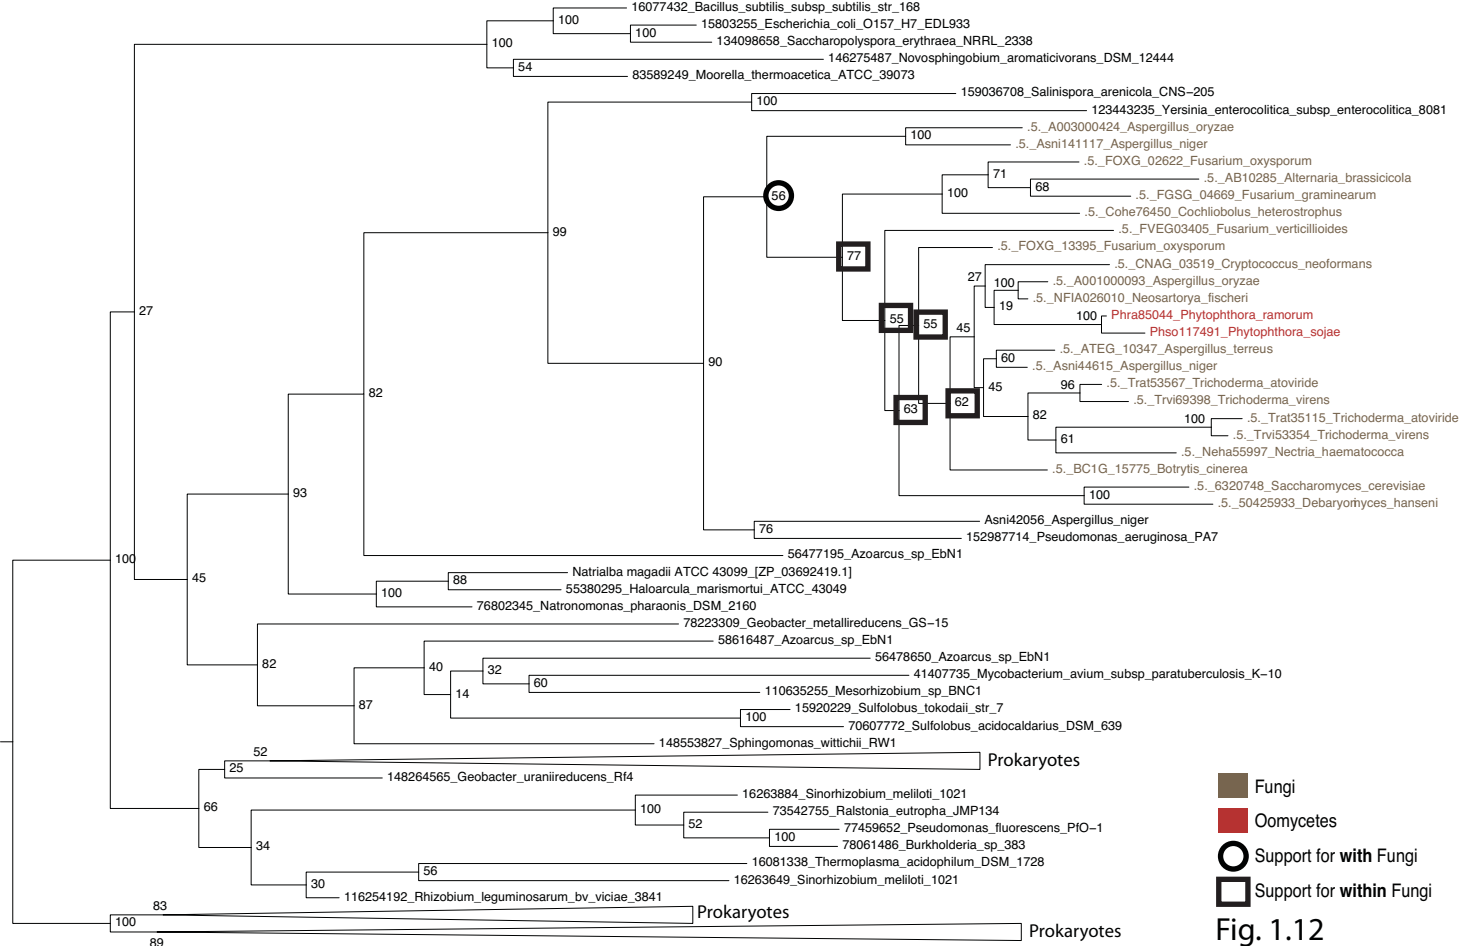

Fig. 1.12

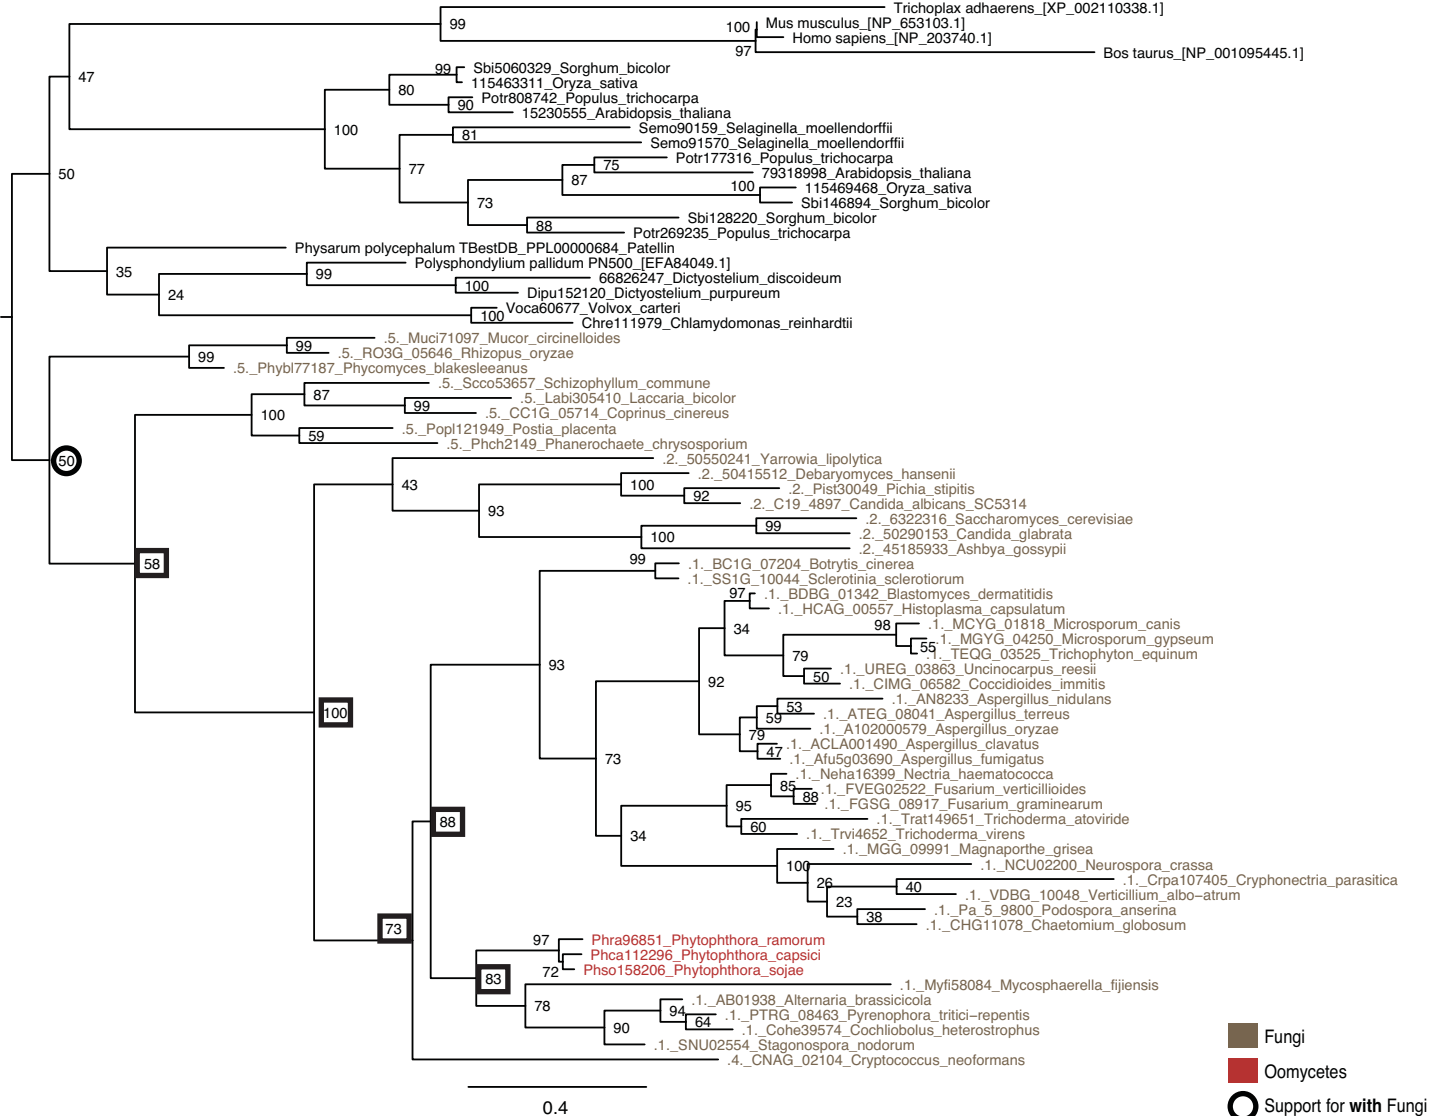

Fig. 1.13

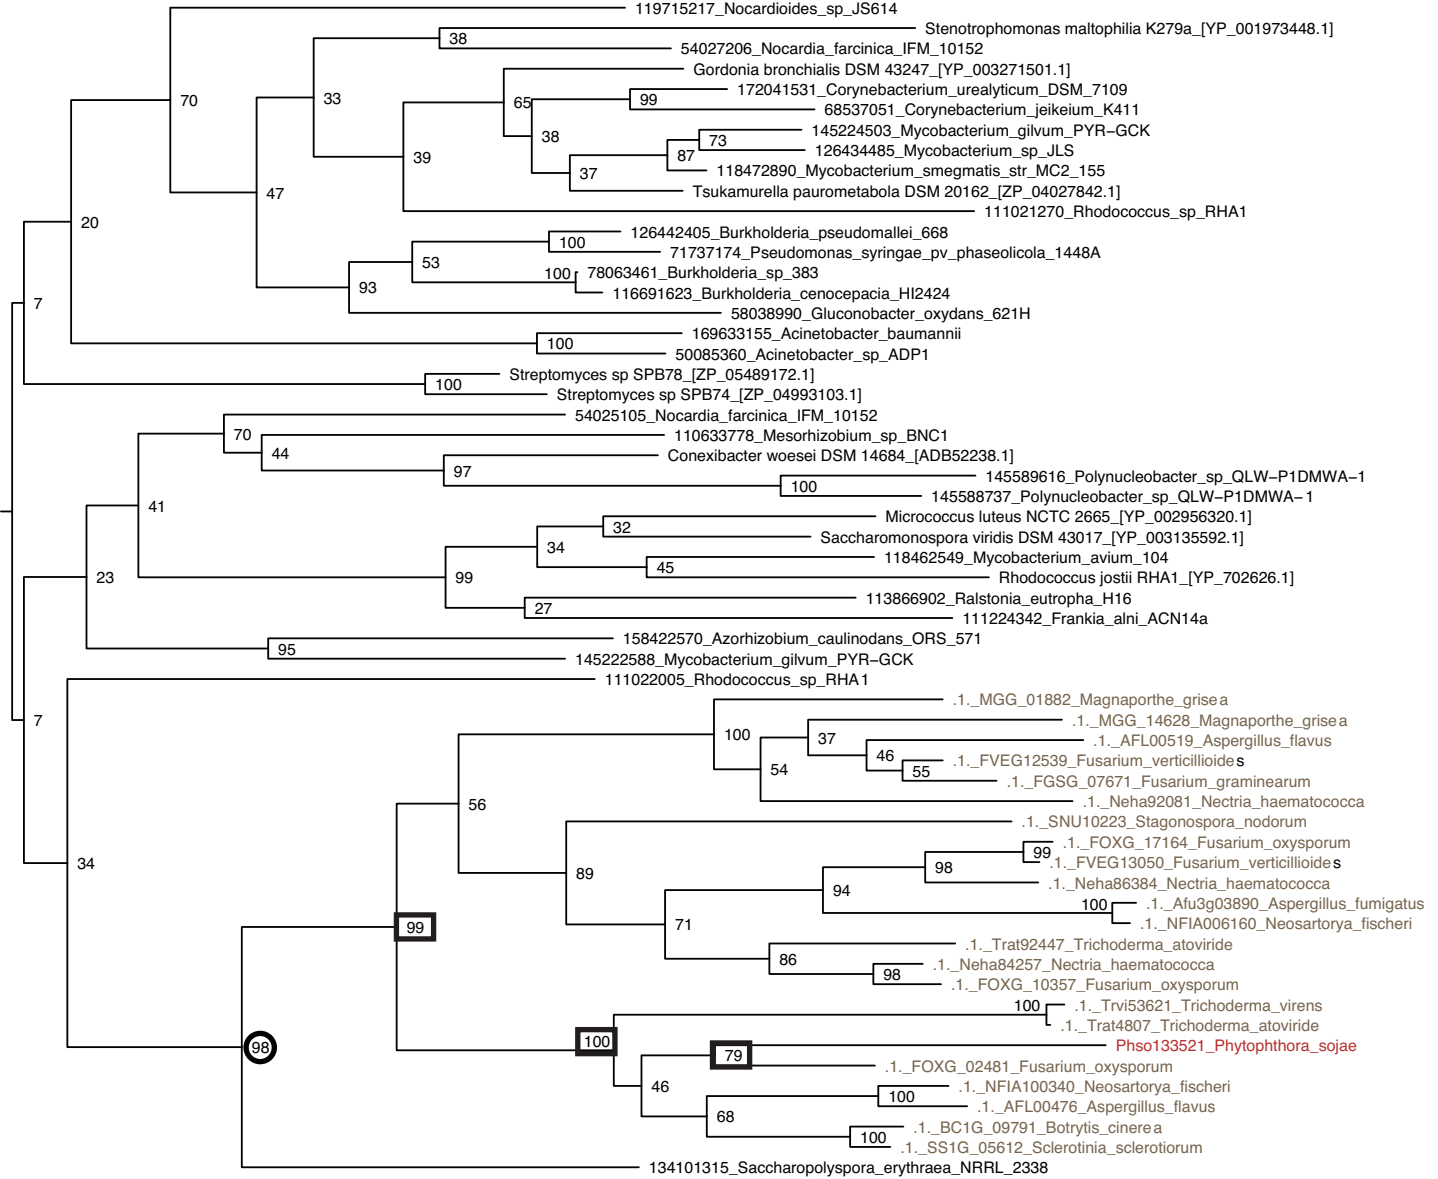

0.3

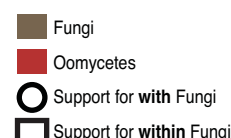

Fig. 1.14

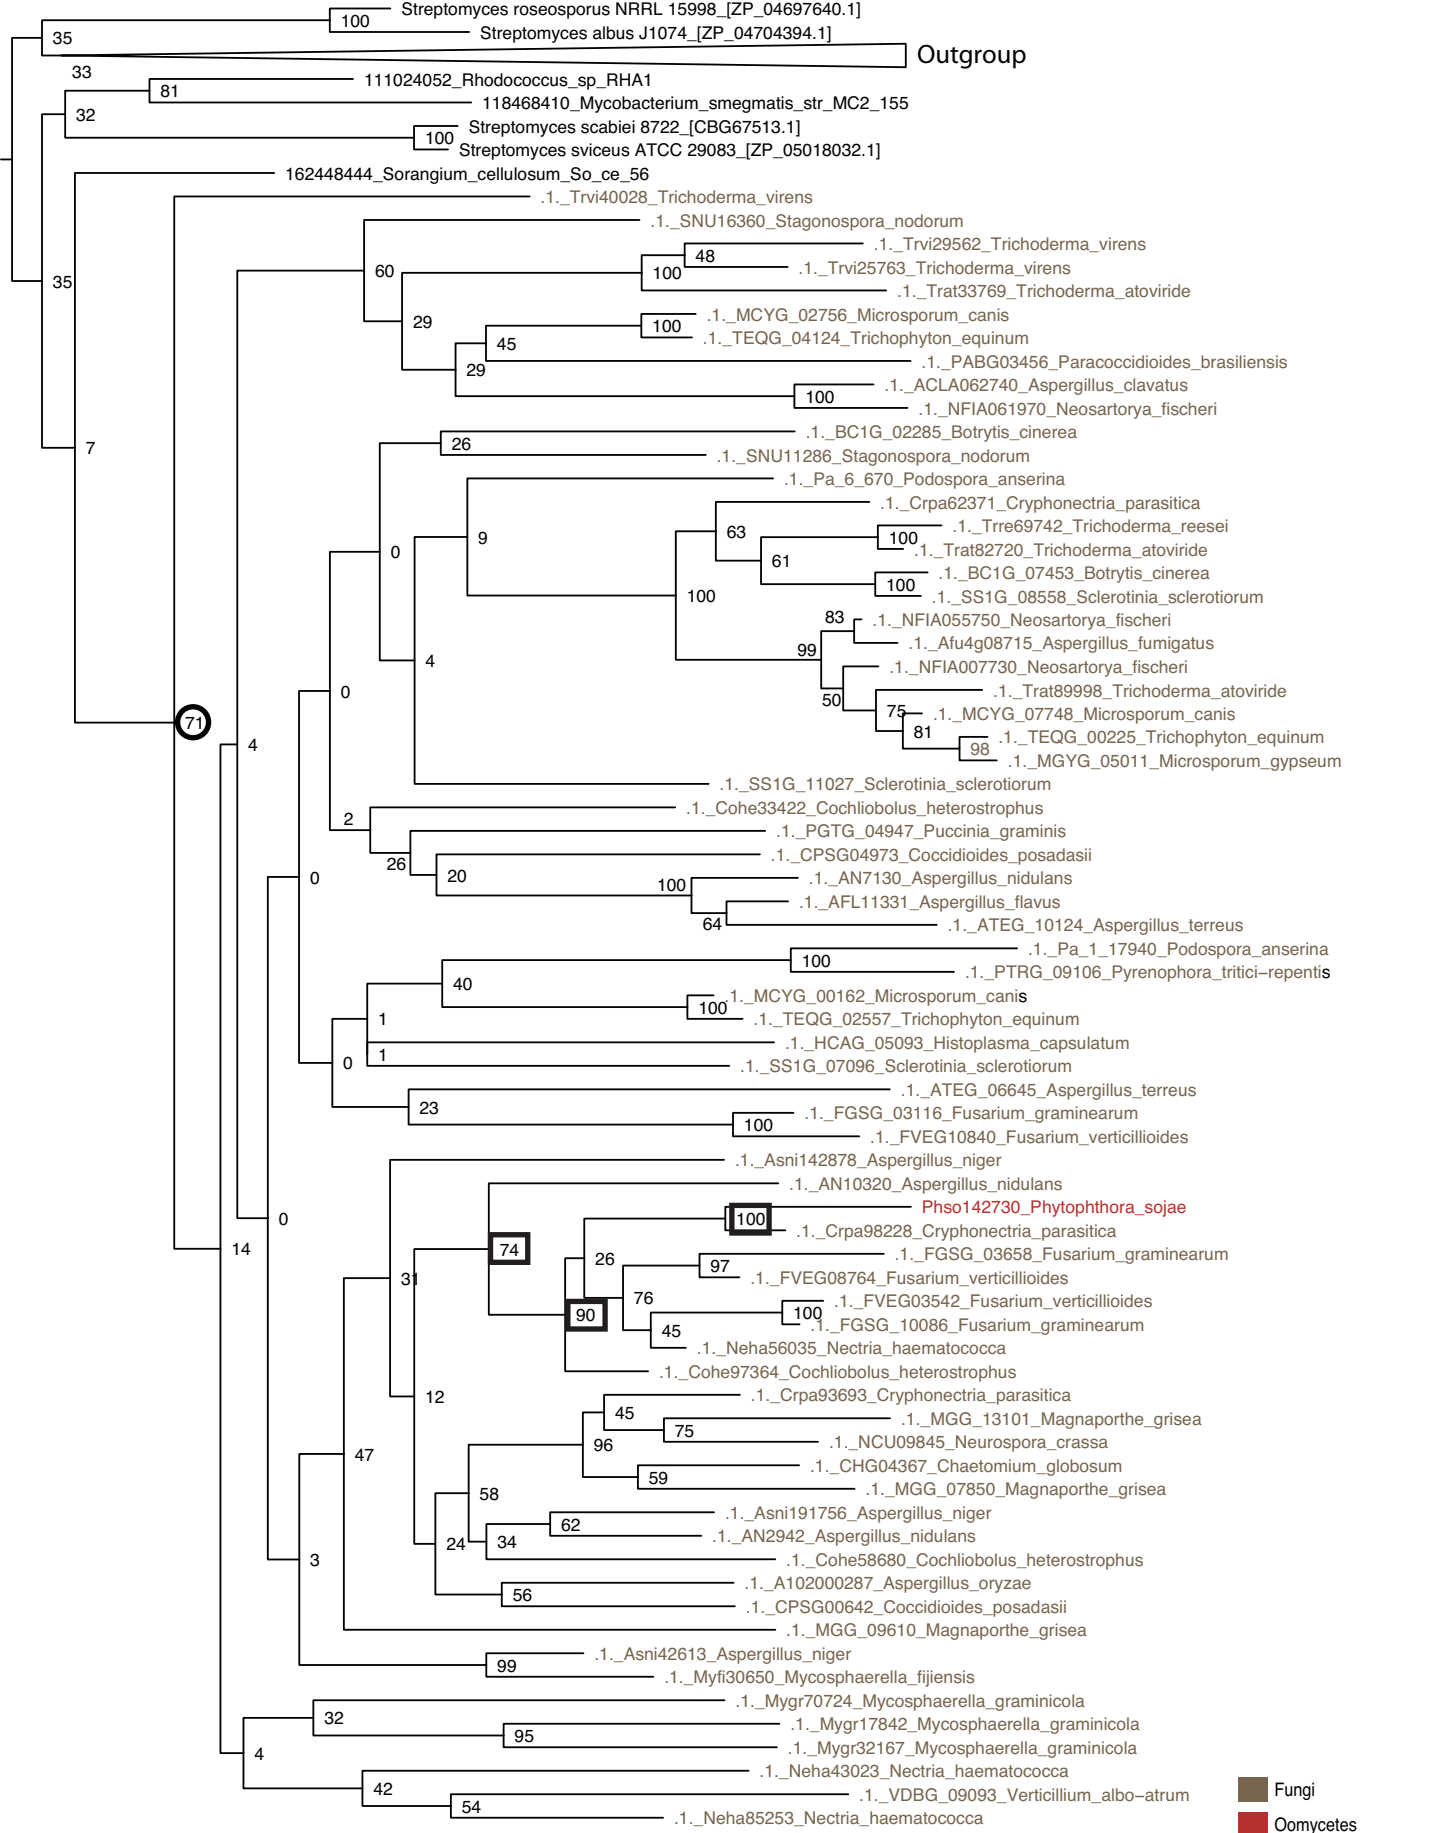

Fungi  
 Oomycetes  
 Support for with Fungi  
 Support for within Fungi

Fig. 1.15

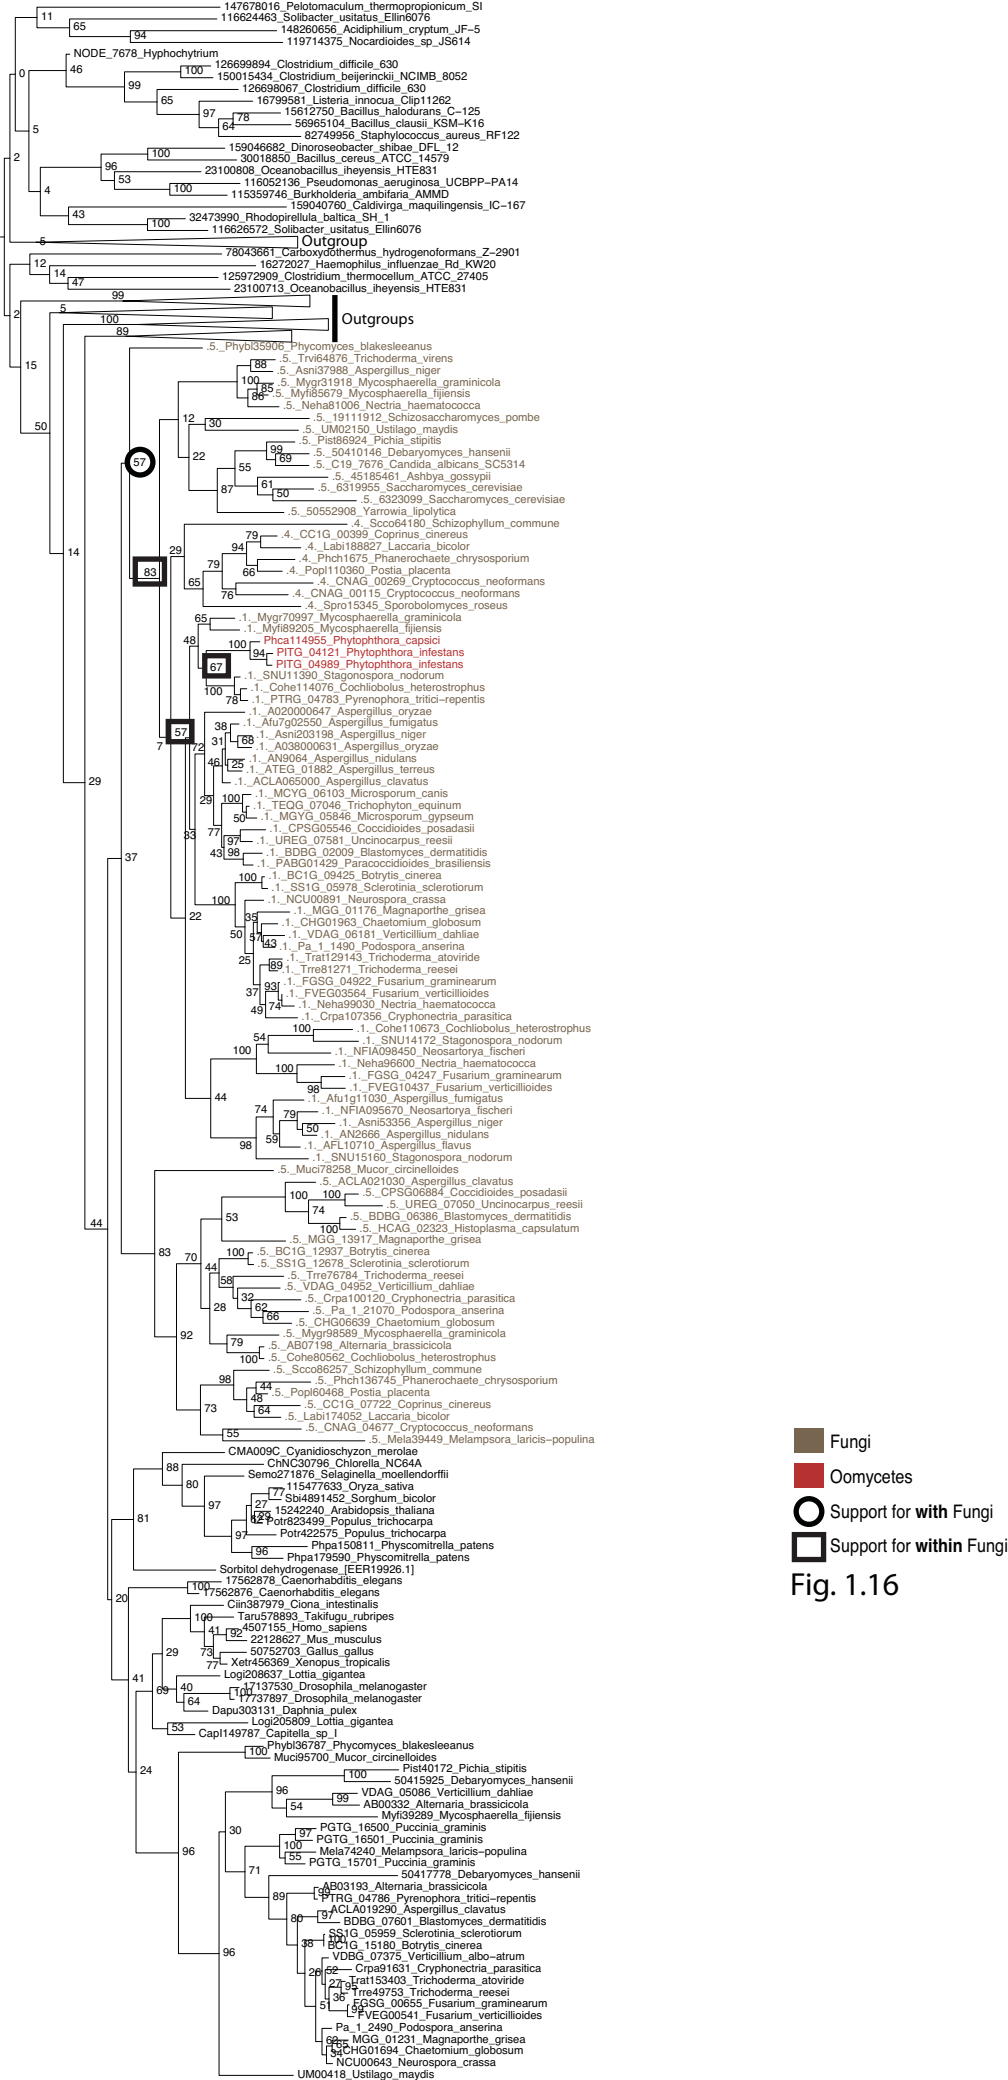



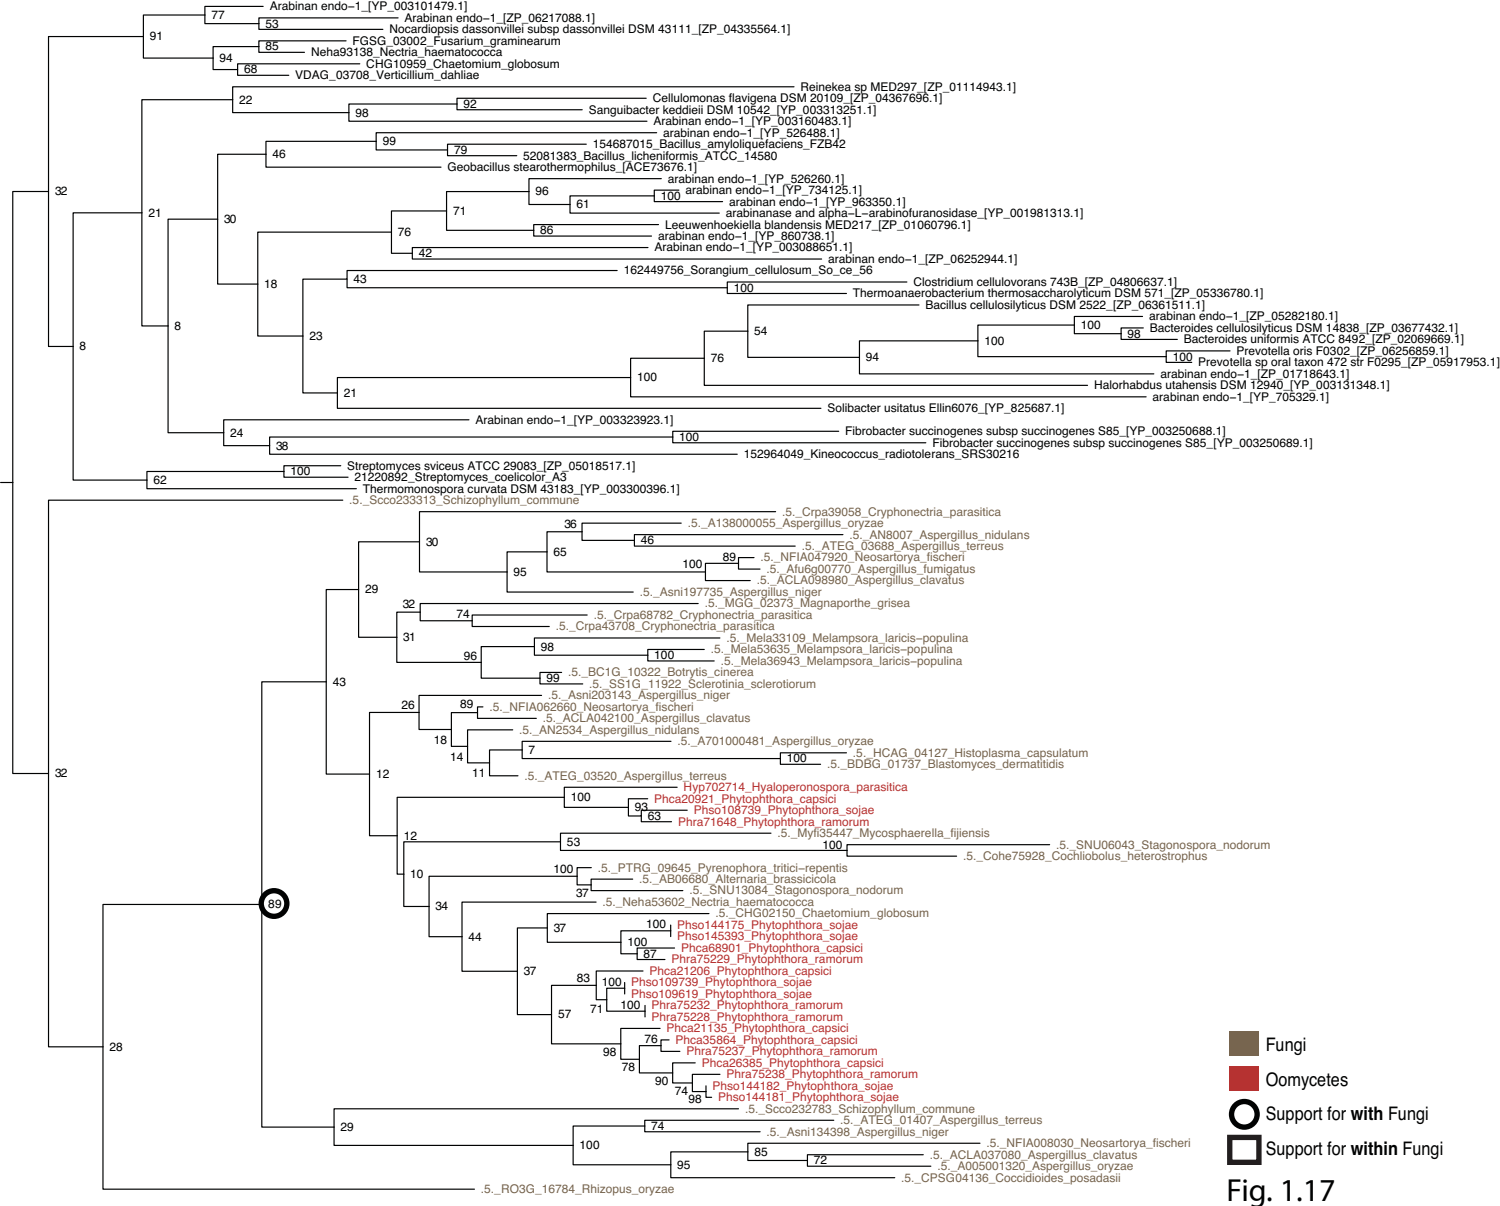

Fig. 1.17

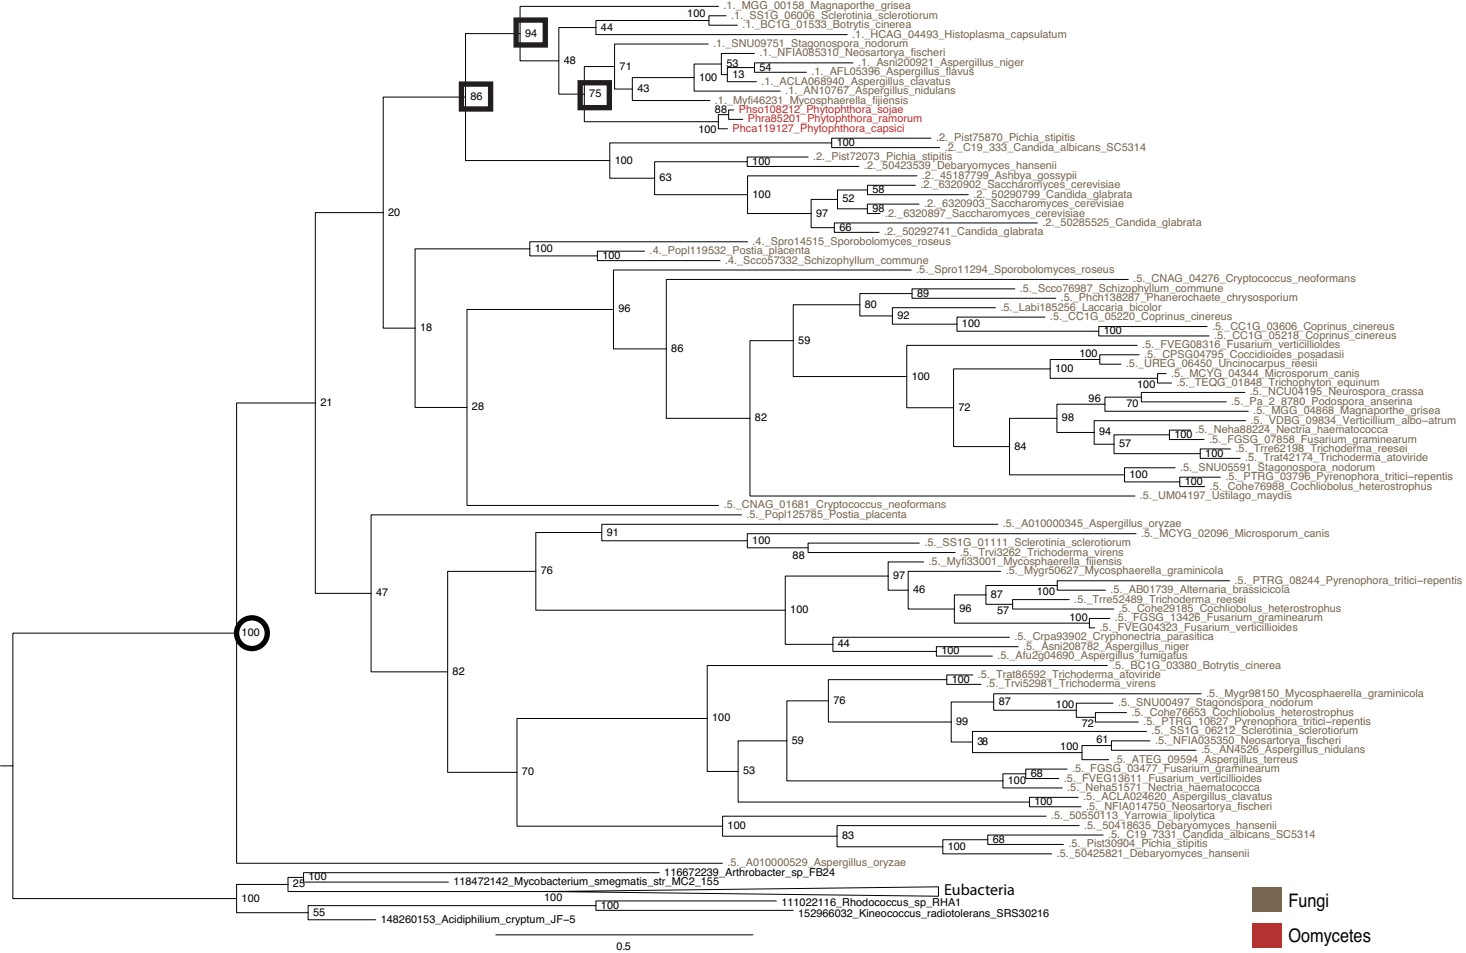

Fig. 1.18

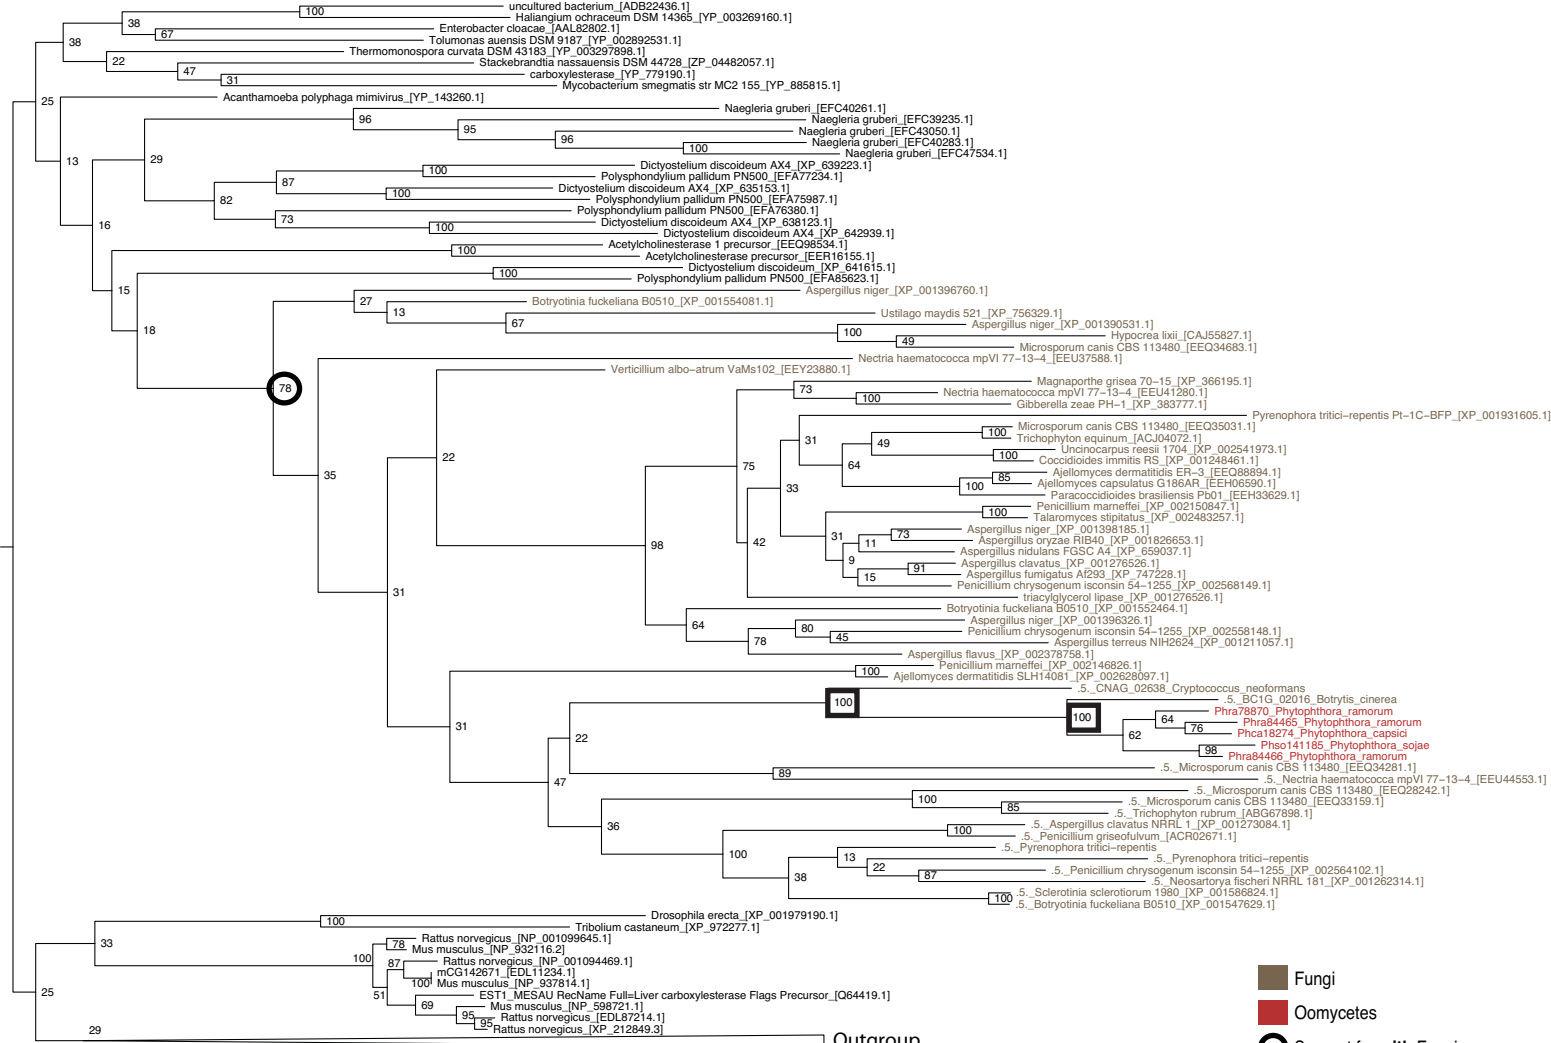

Fungi  
 Oomycetes  
 Support for with Fungi  
 Support for within Fungi

Fig. 1.19

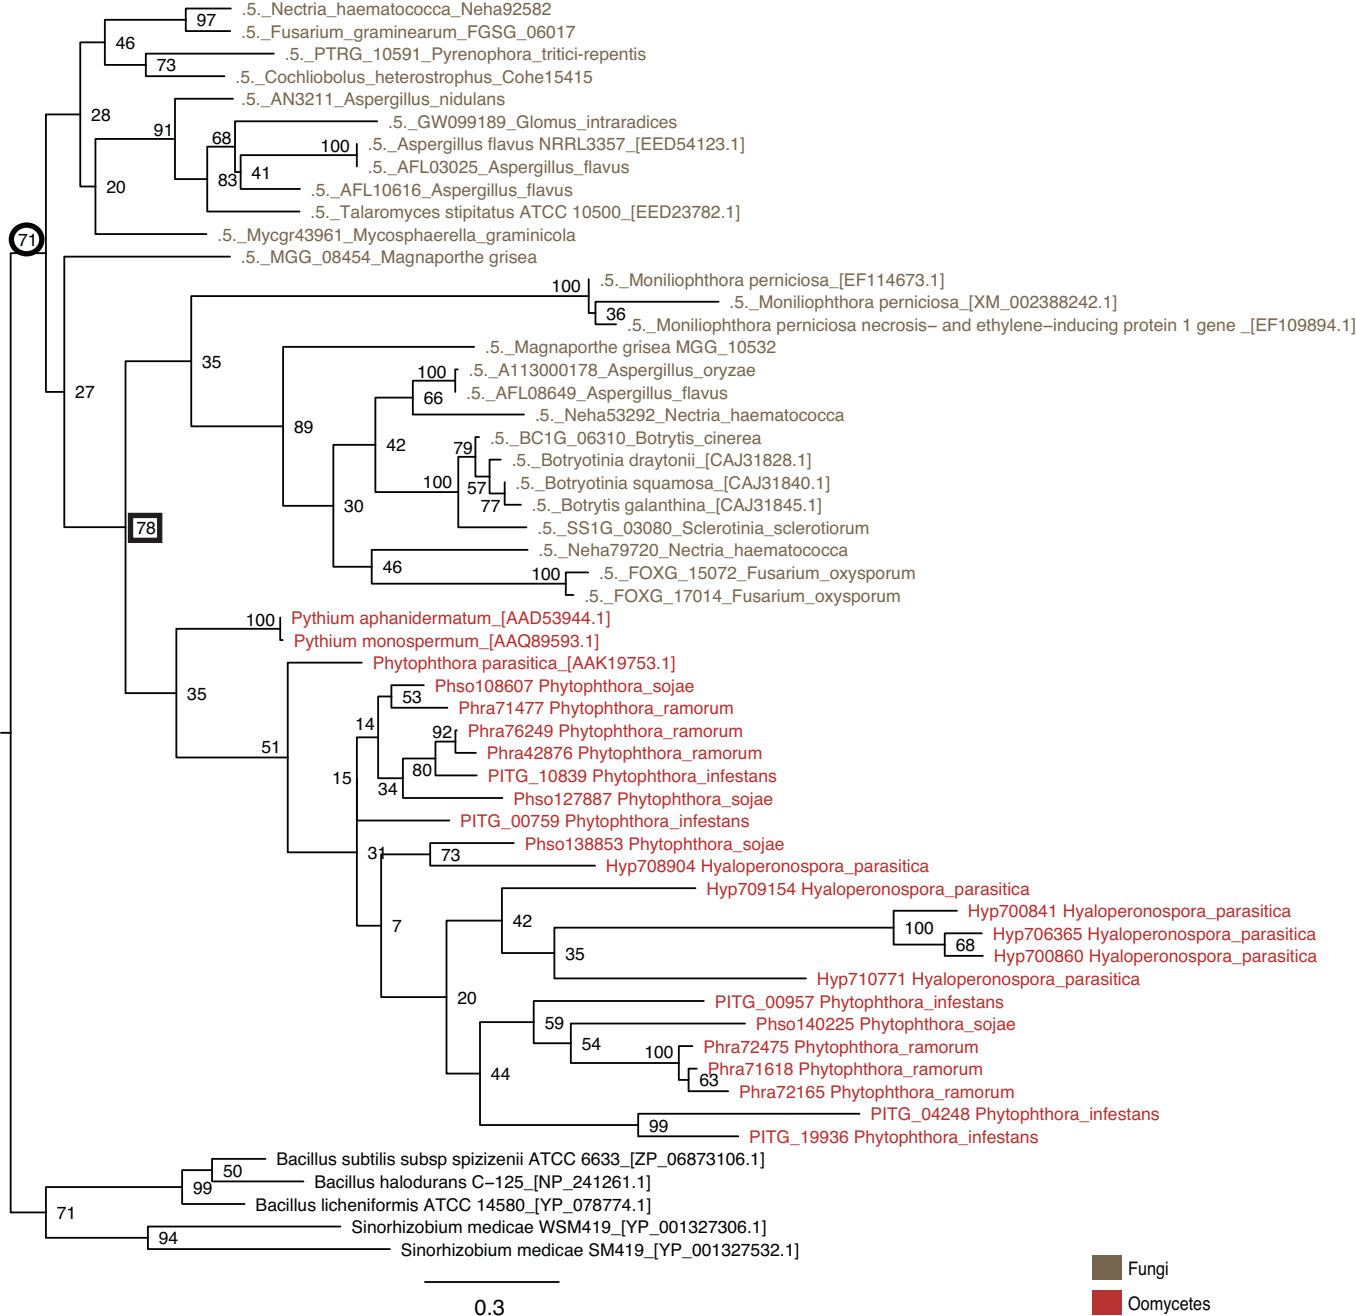

Fig. 1.20

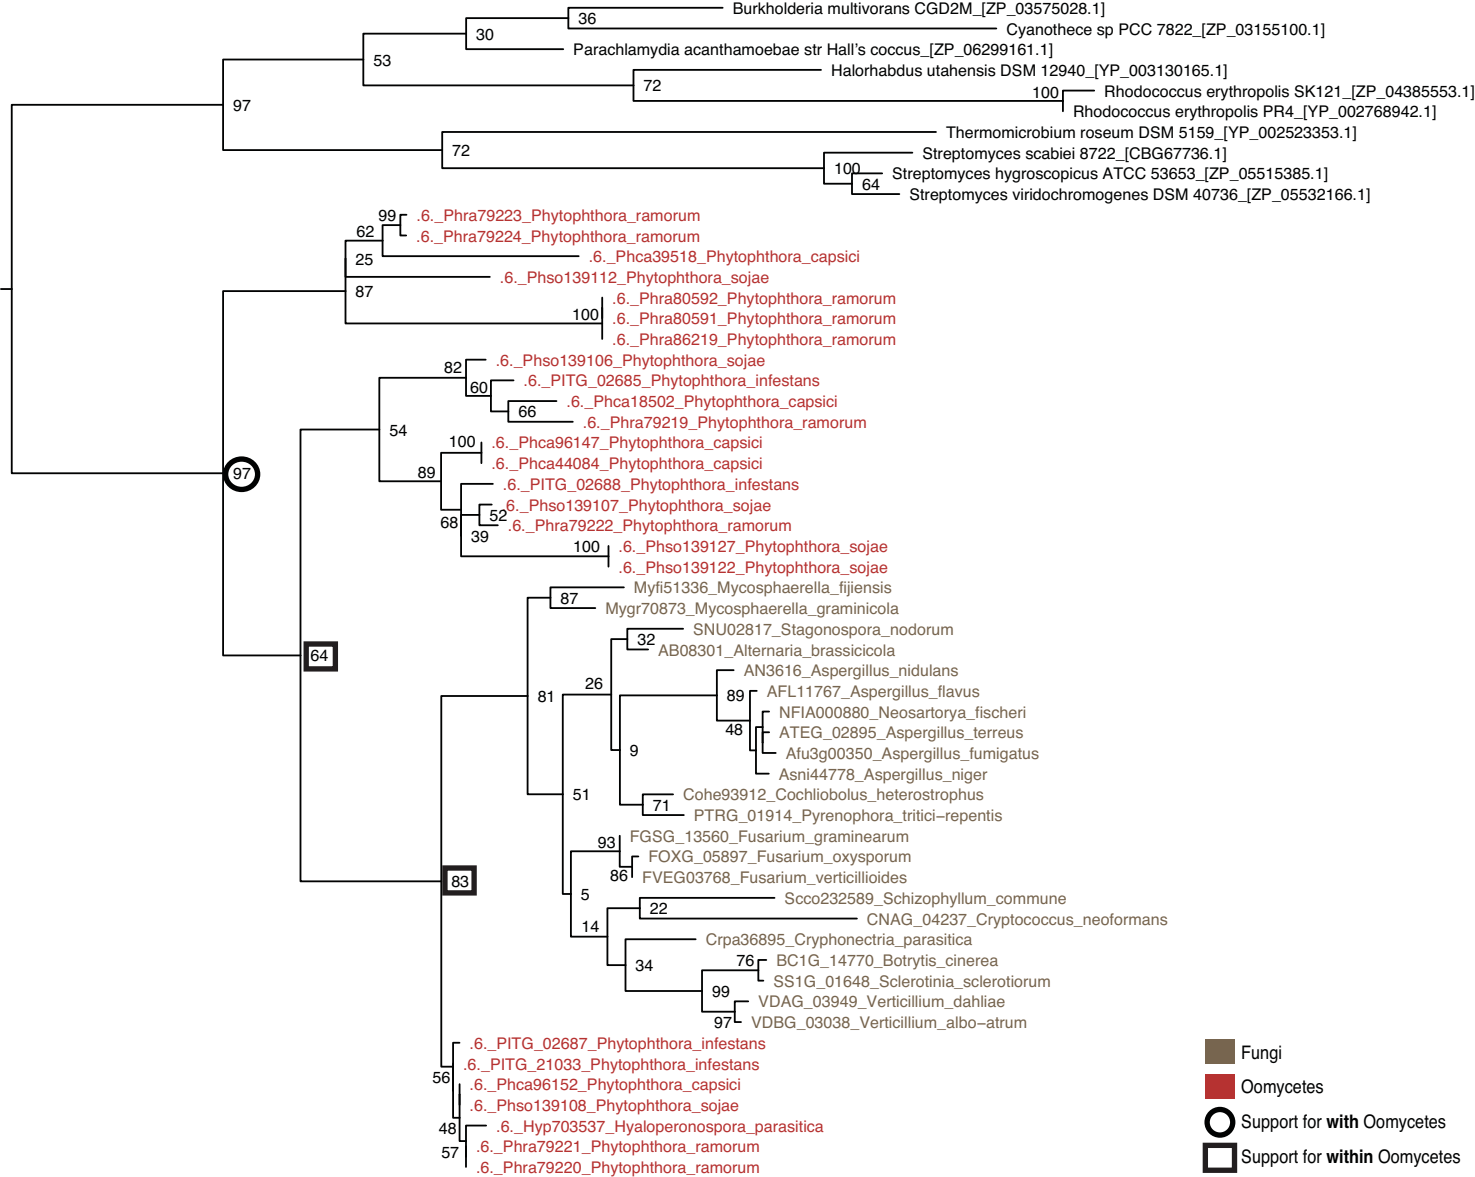

Fig. 1.21

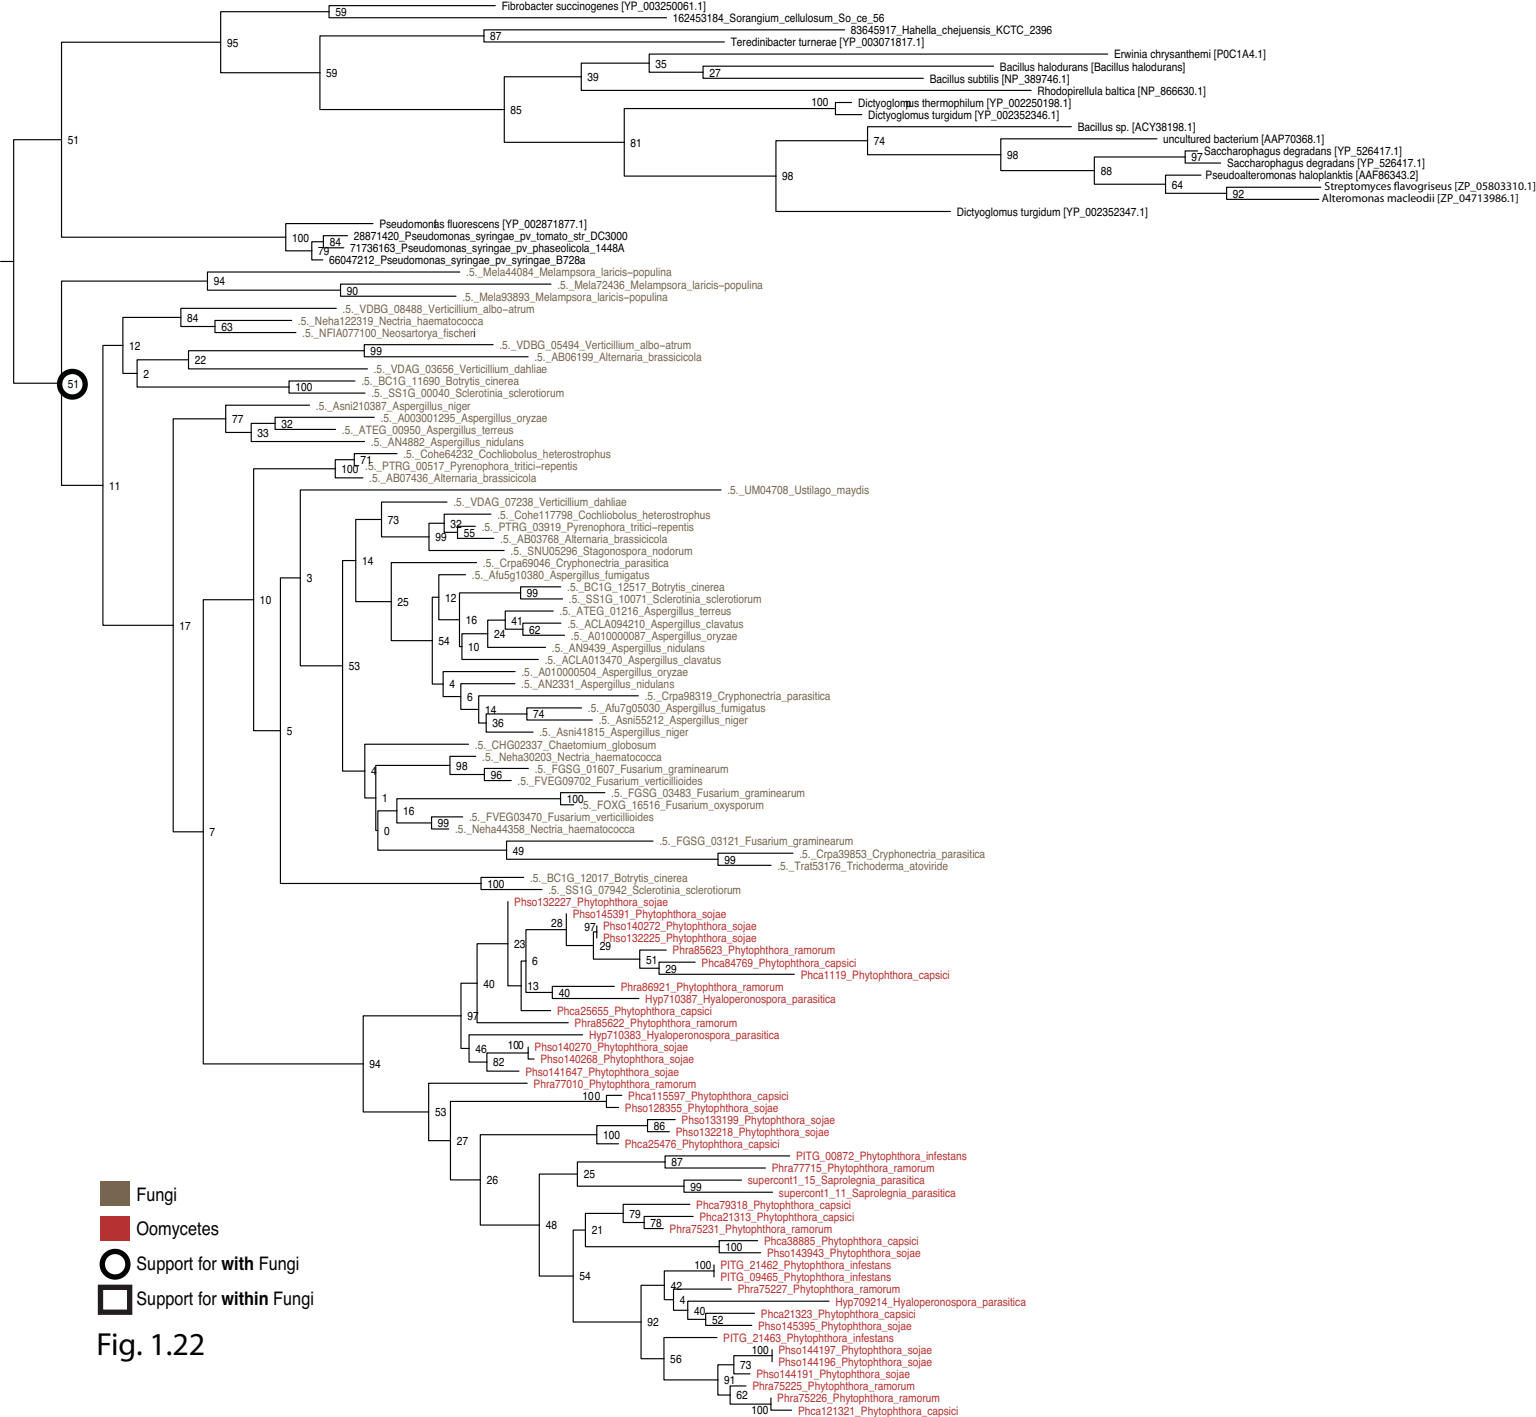

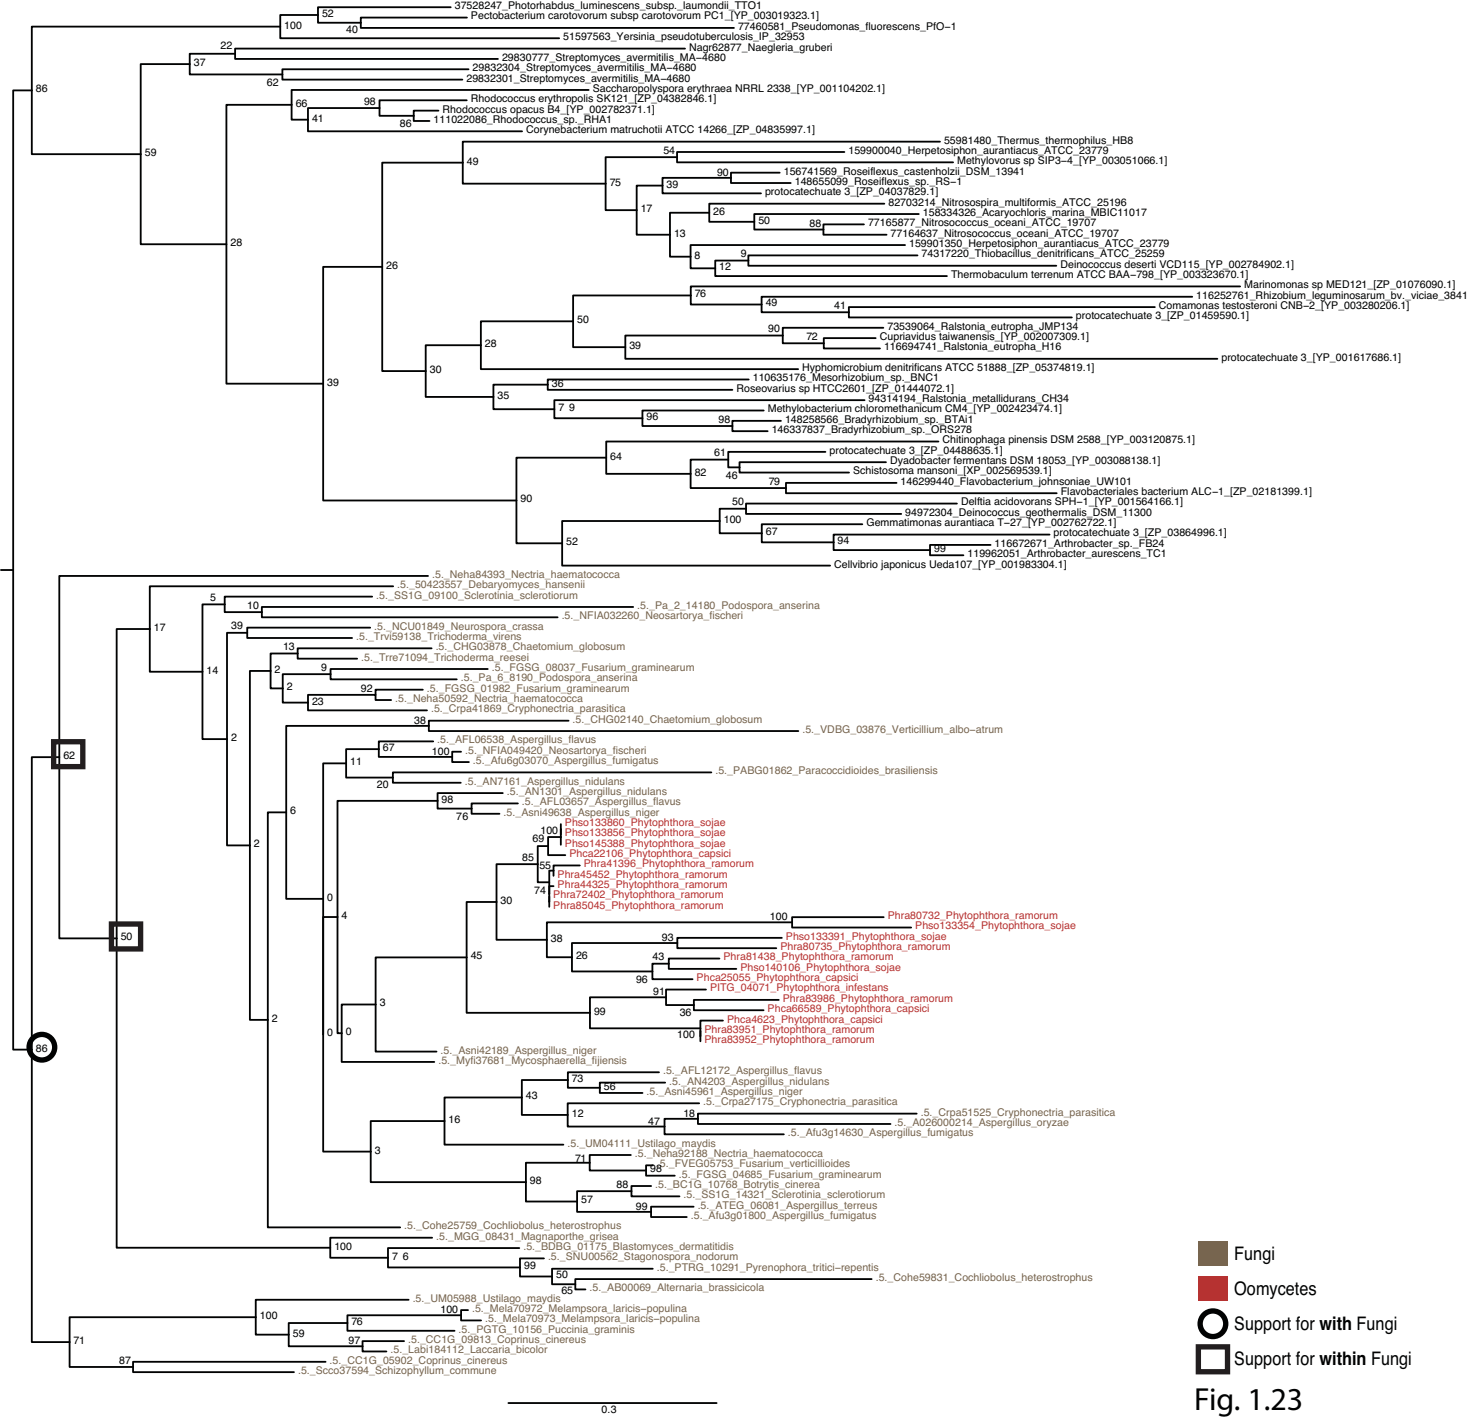

Fig. 1.23

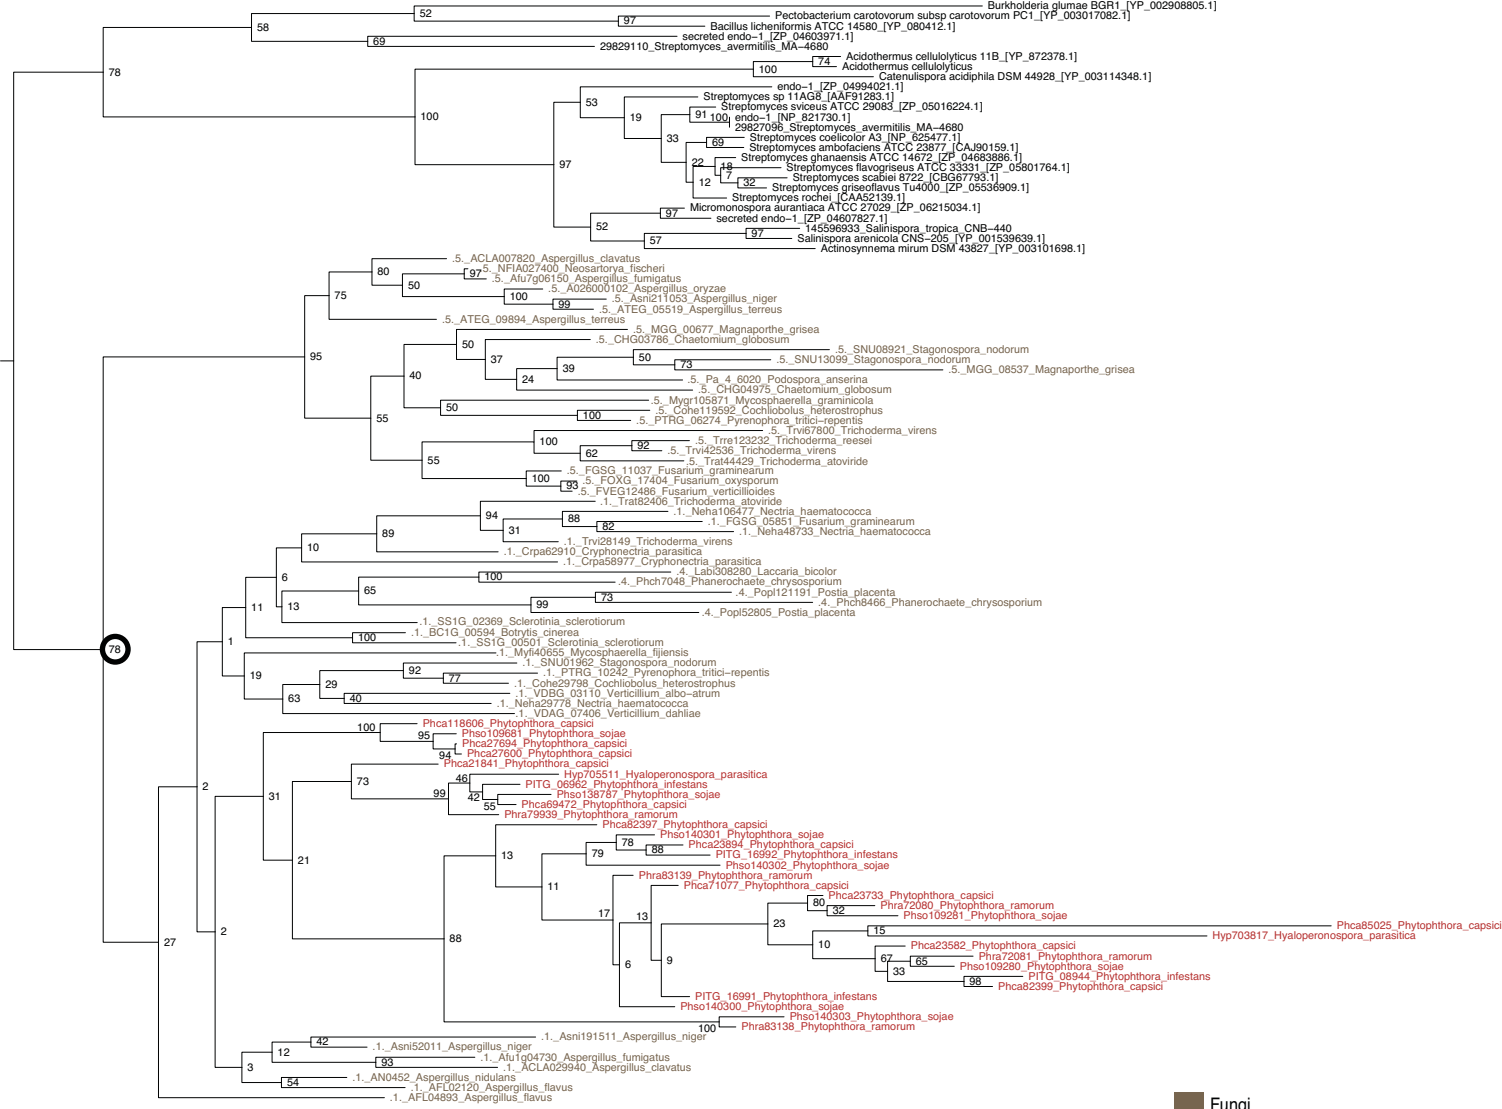

■ Fungi  
■ Oomycetes  
 ○ Support for with Fungi  
 □ Support for within Fungi

Fig. 1.24



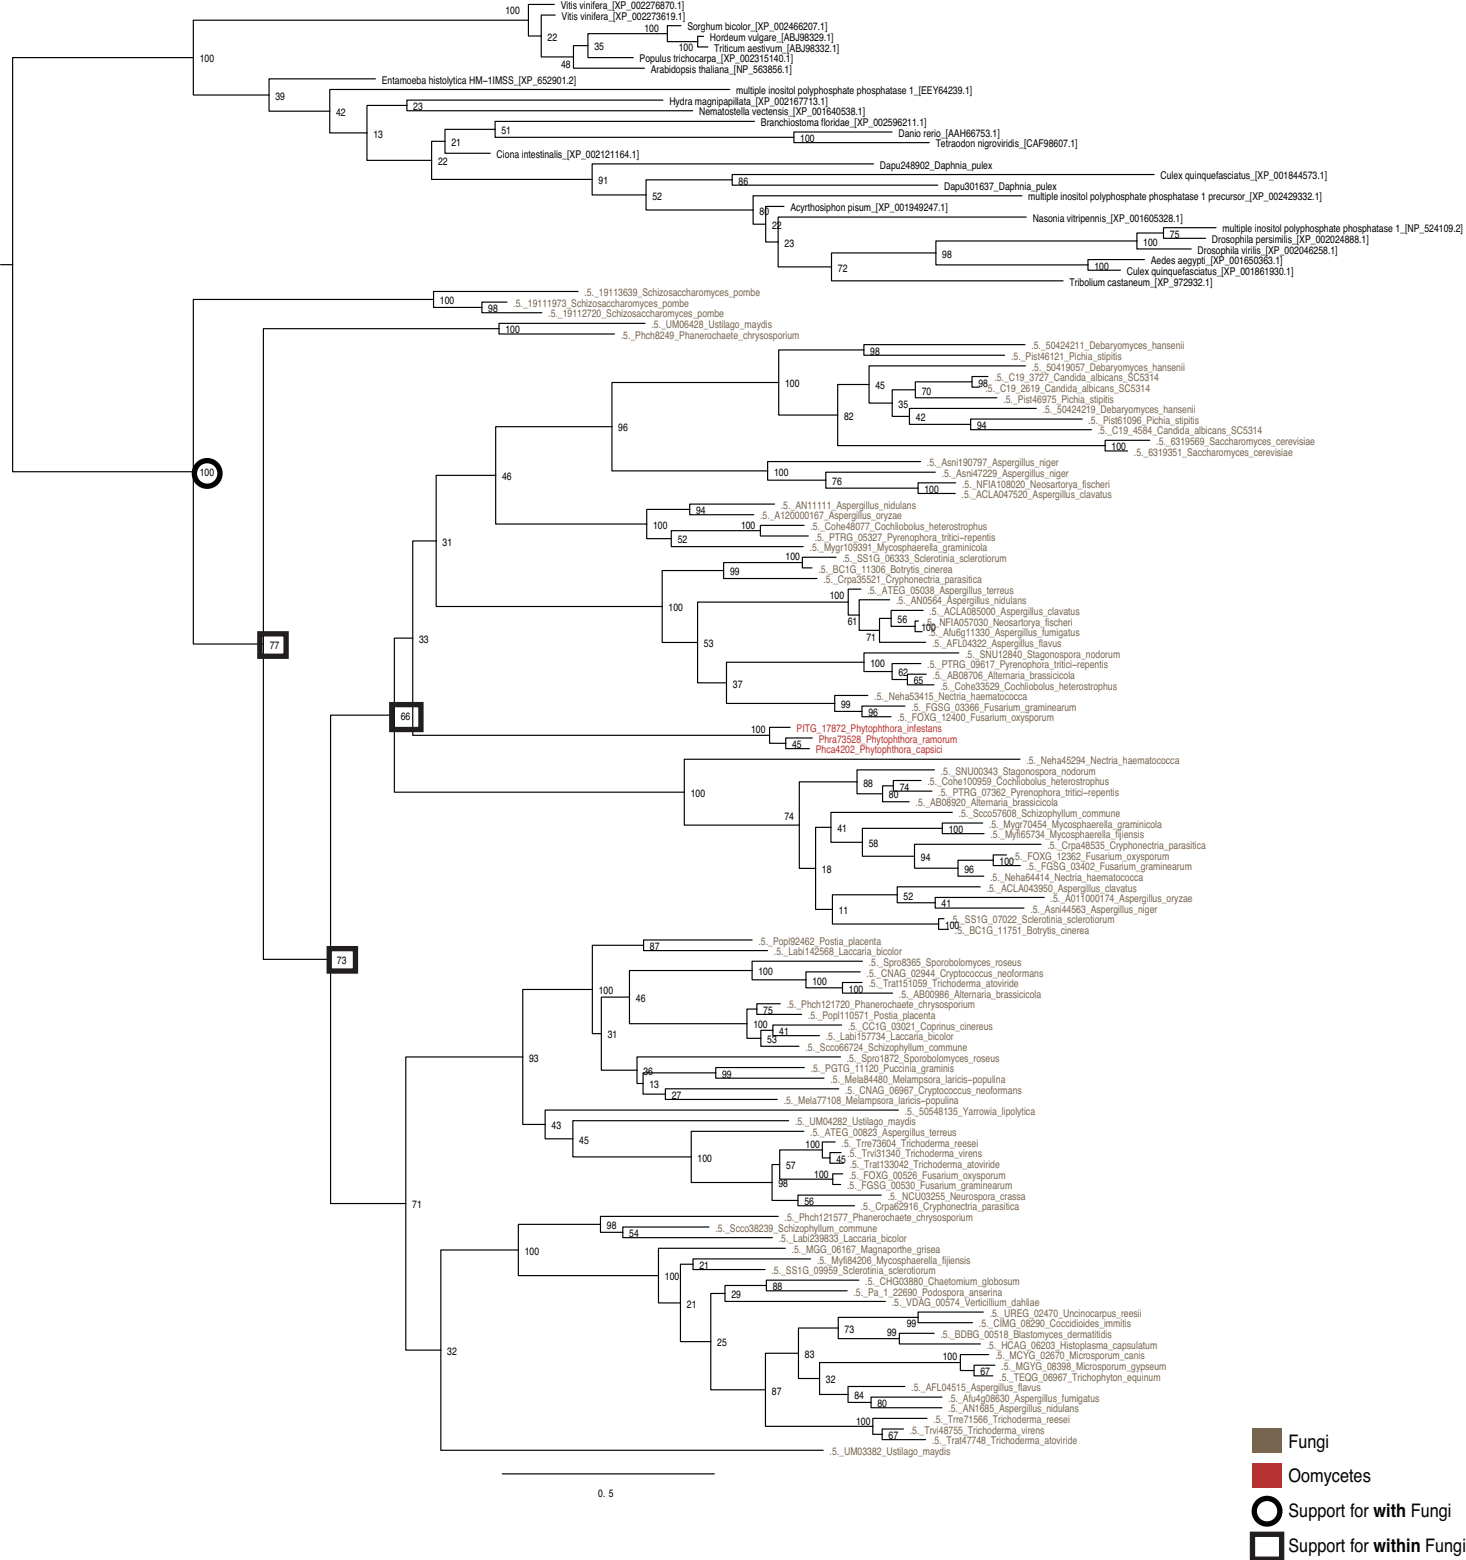

Fig. 1.25

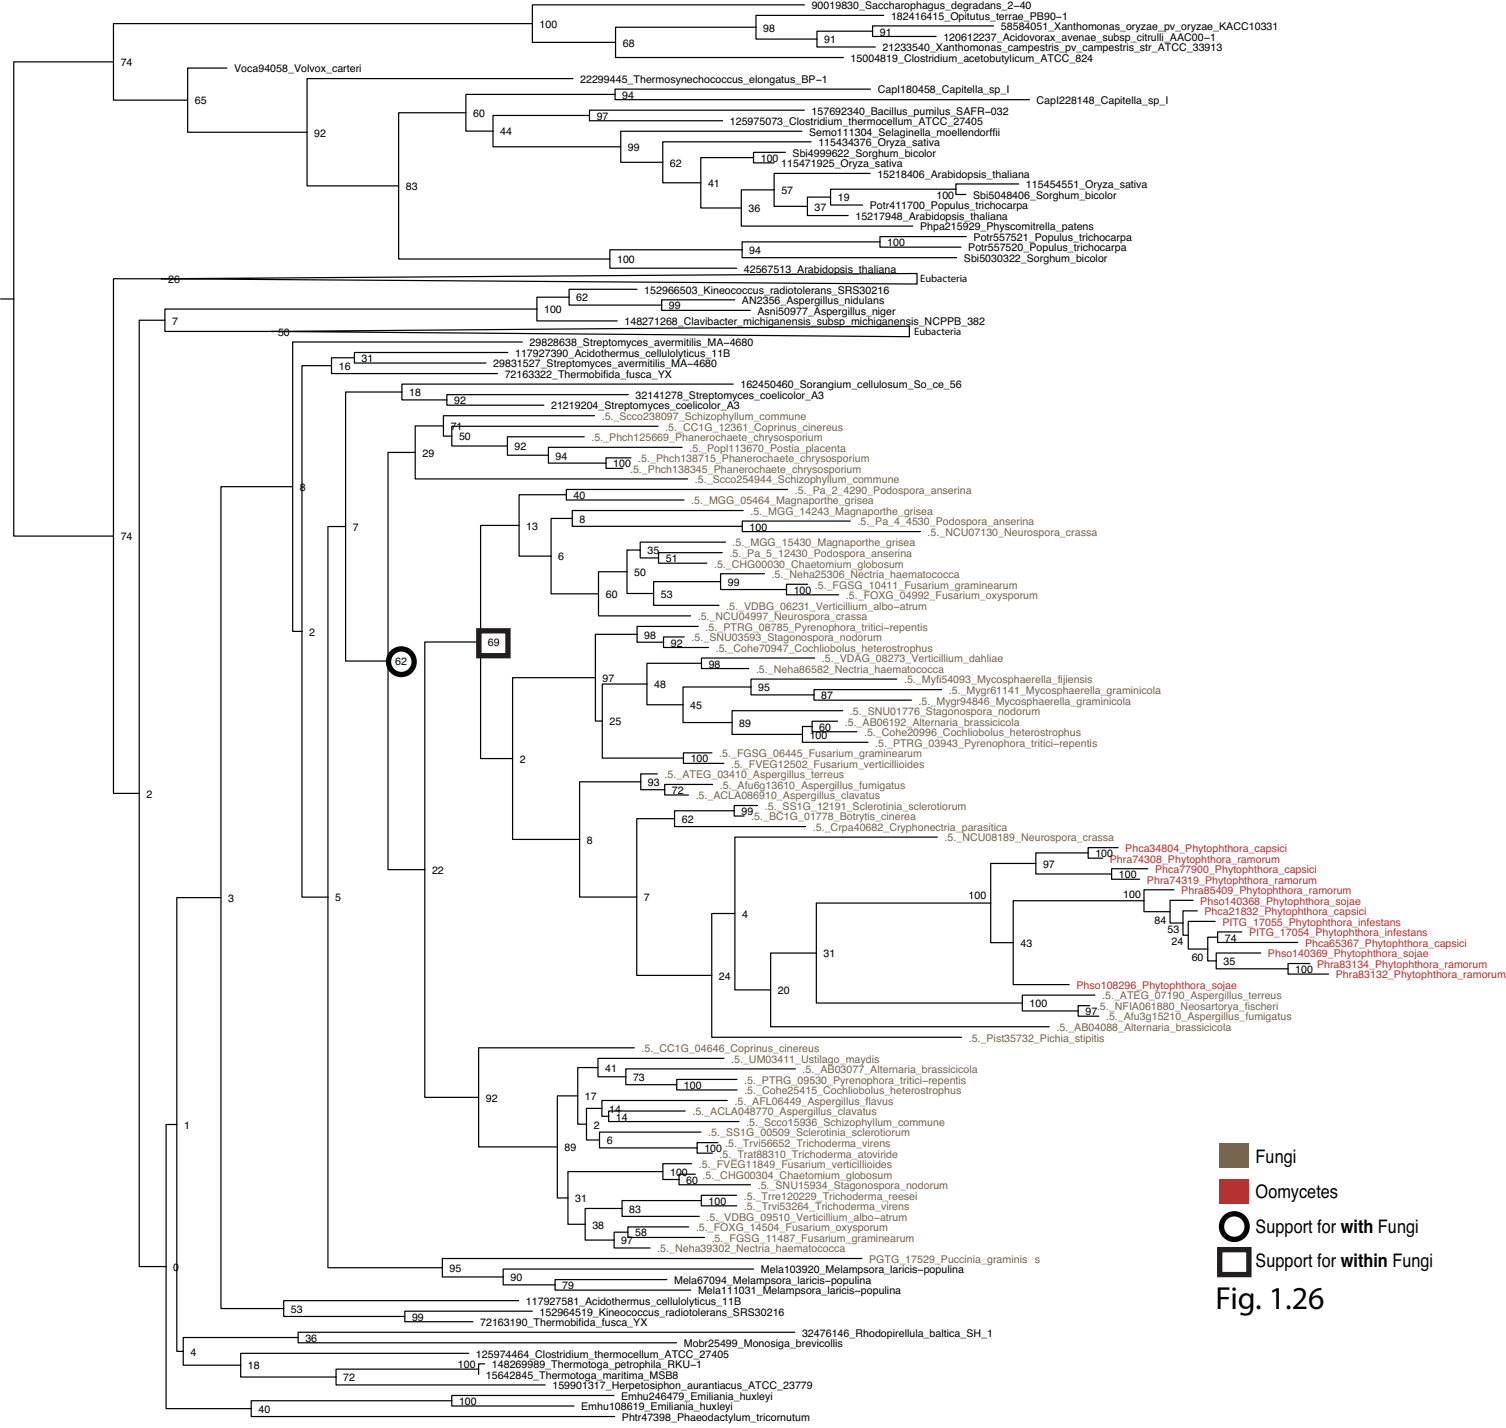

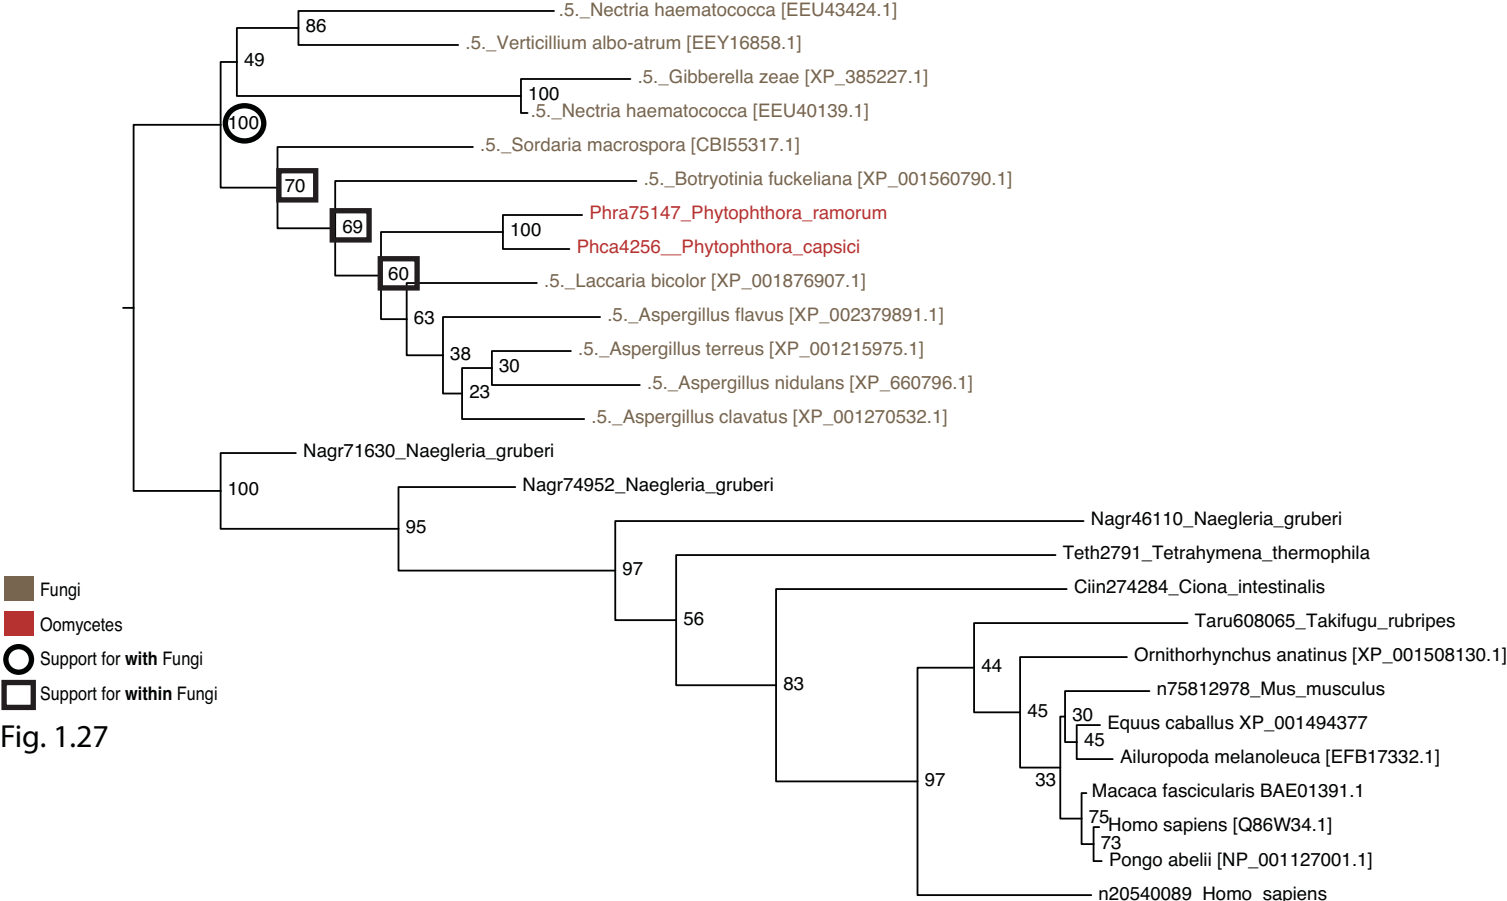

Fig. 1.27

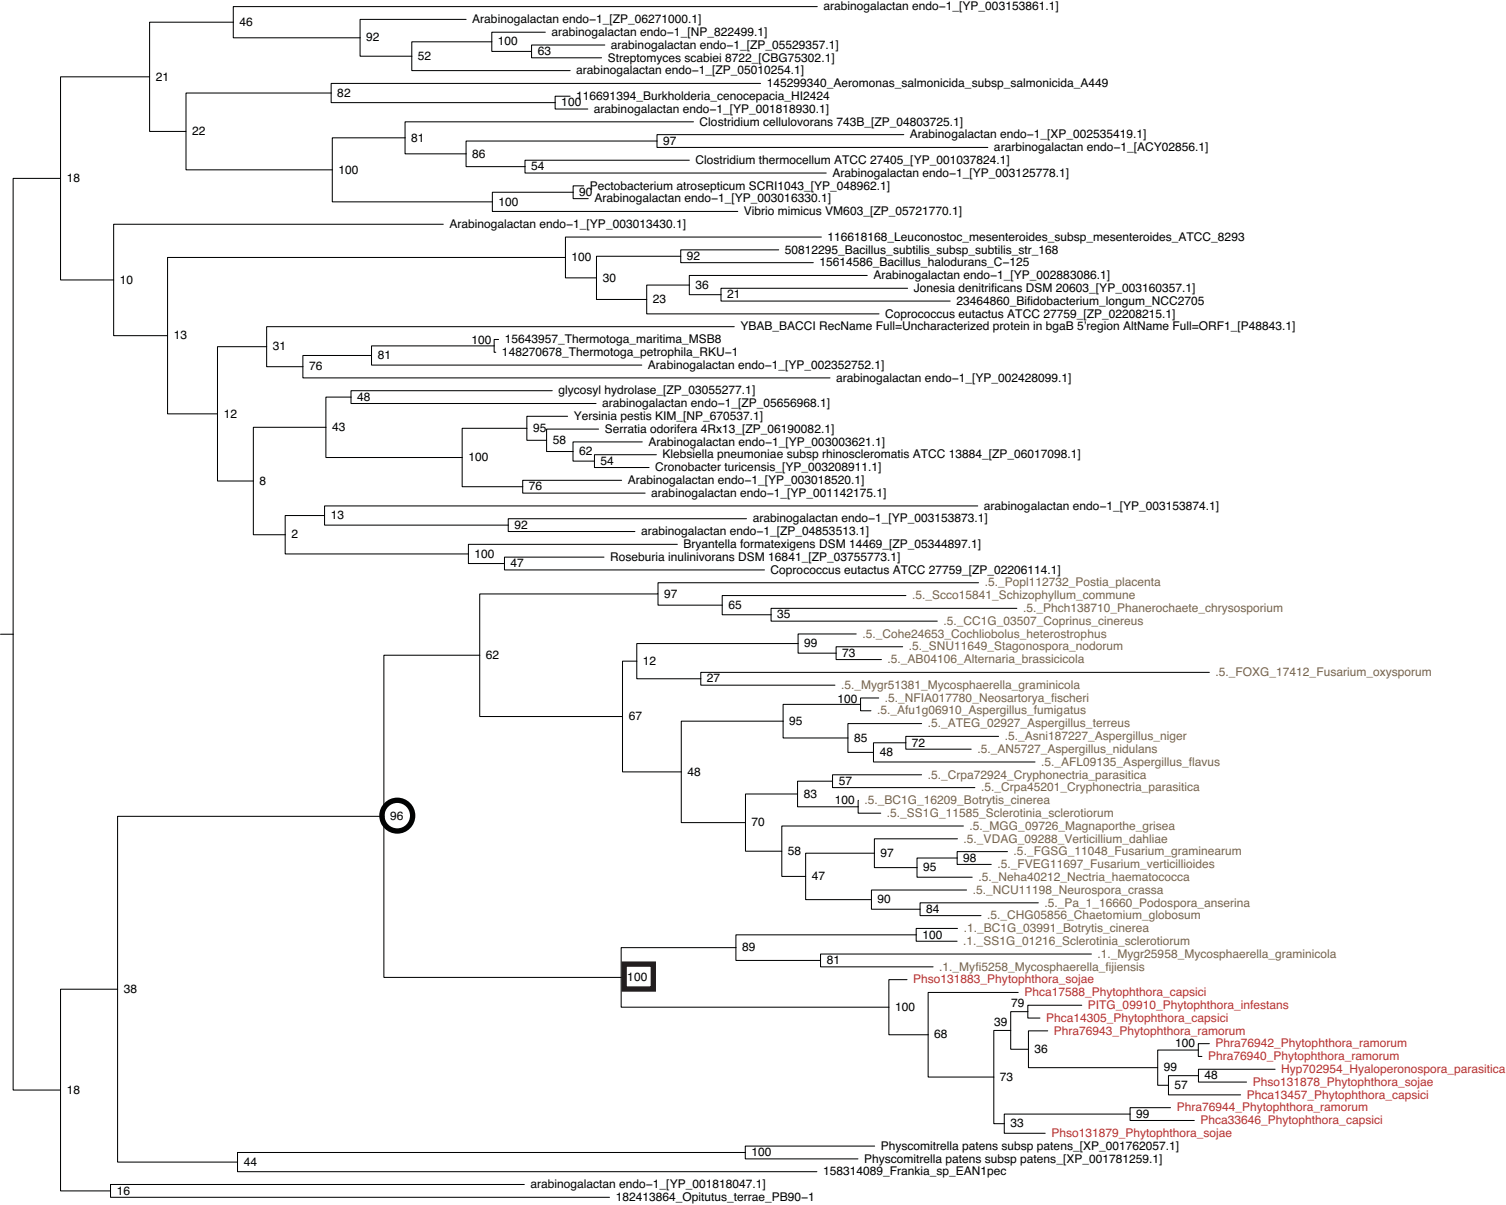

0.3

■ Fungi  
 ■ Oomycetes  
 ○ Support for with Fungi  
 □ Support for within Fungi

Fig. 1.28

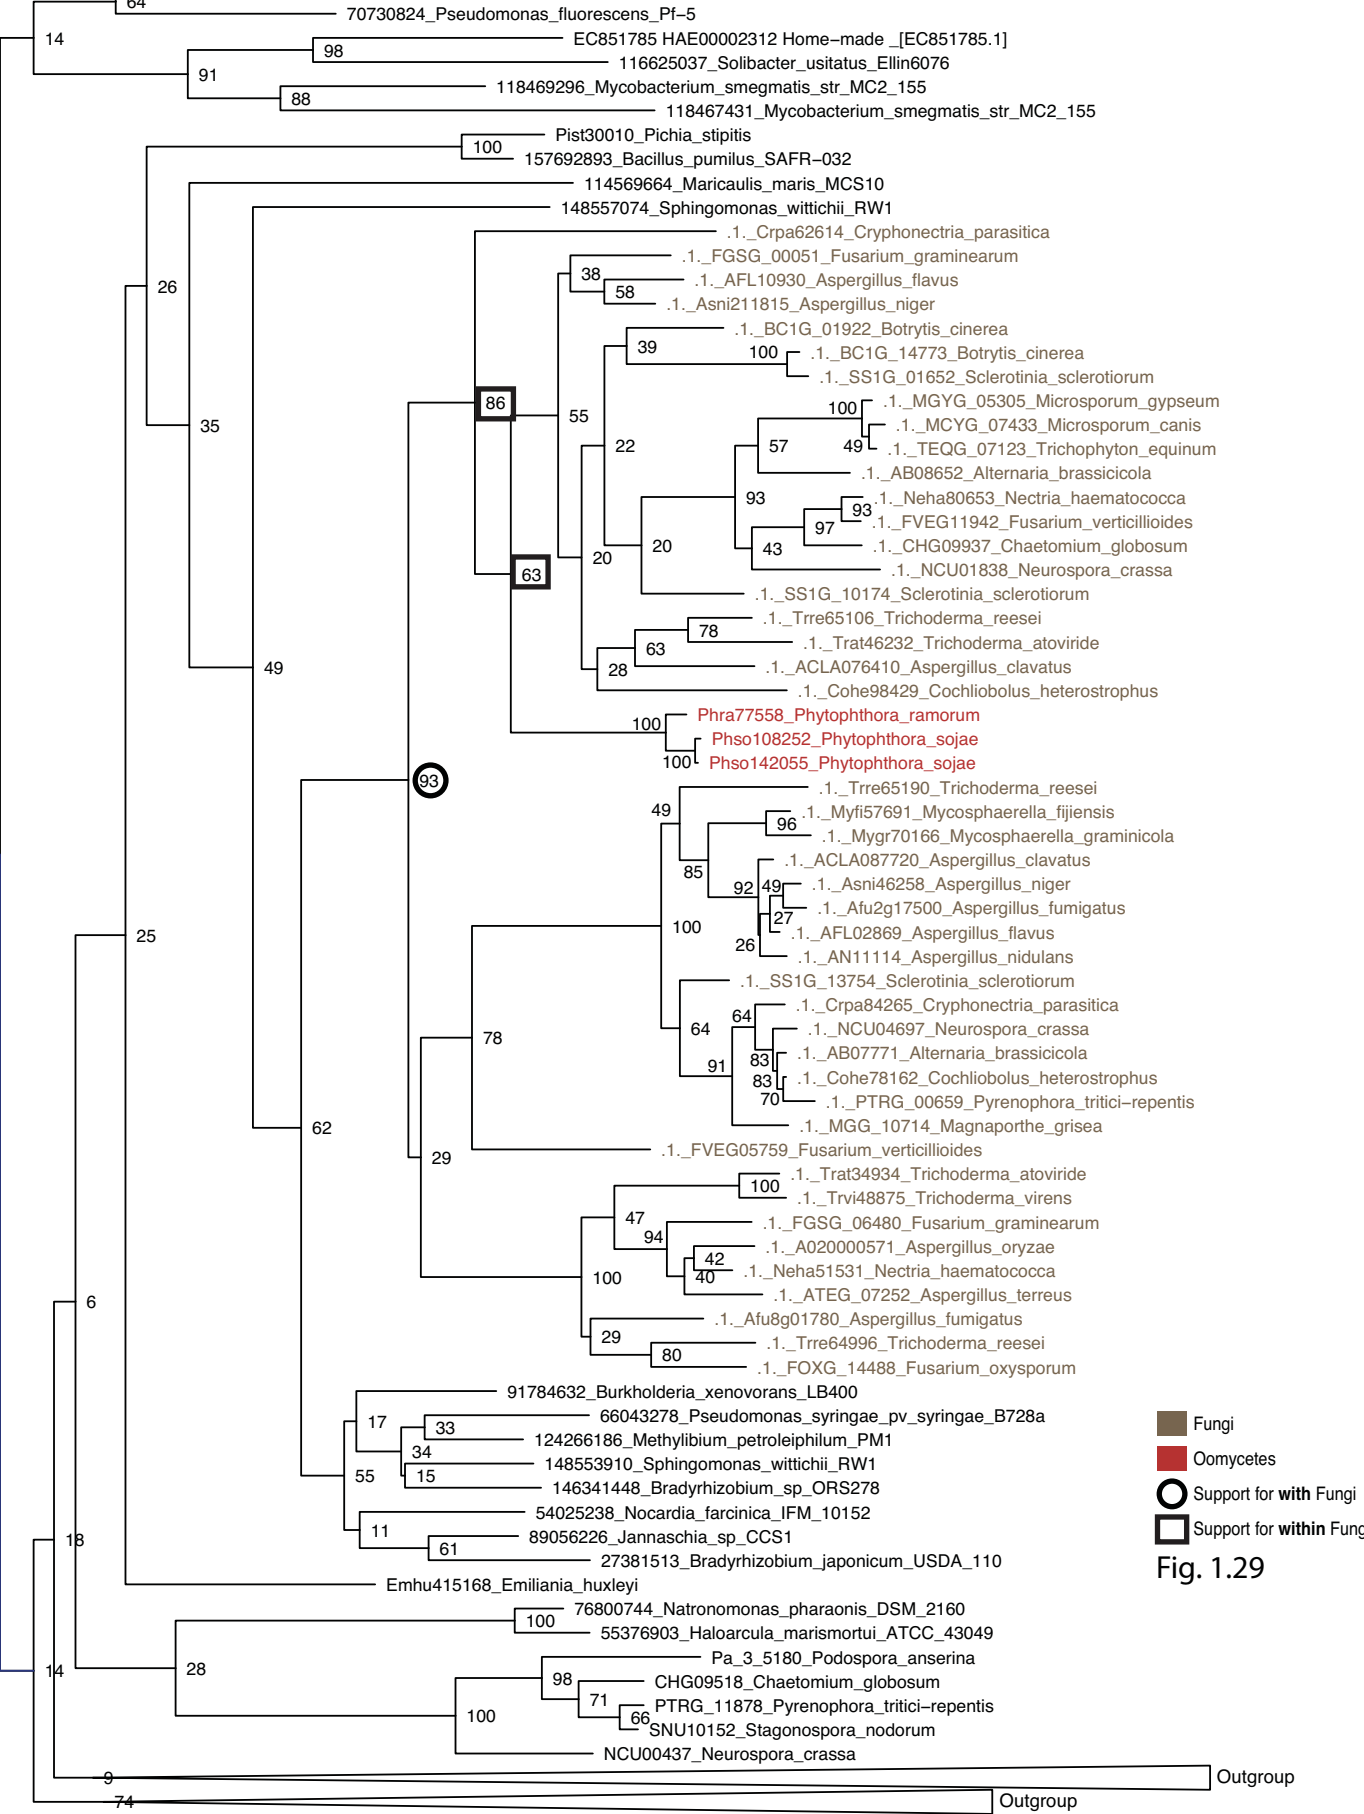

Fungi  
 Oomycetes  
 Support for **with** Fungi  
 Support for **within** Fungi

Fig. 1.29

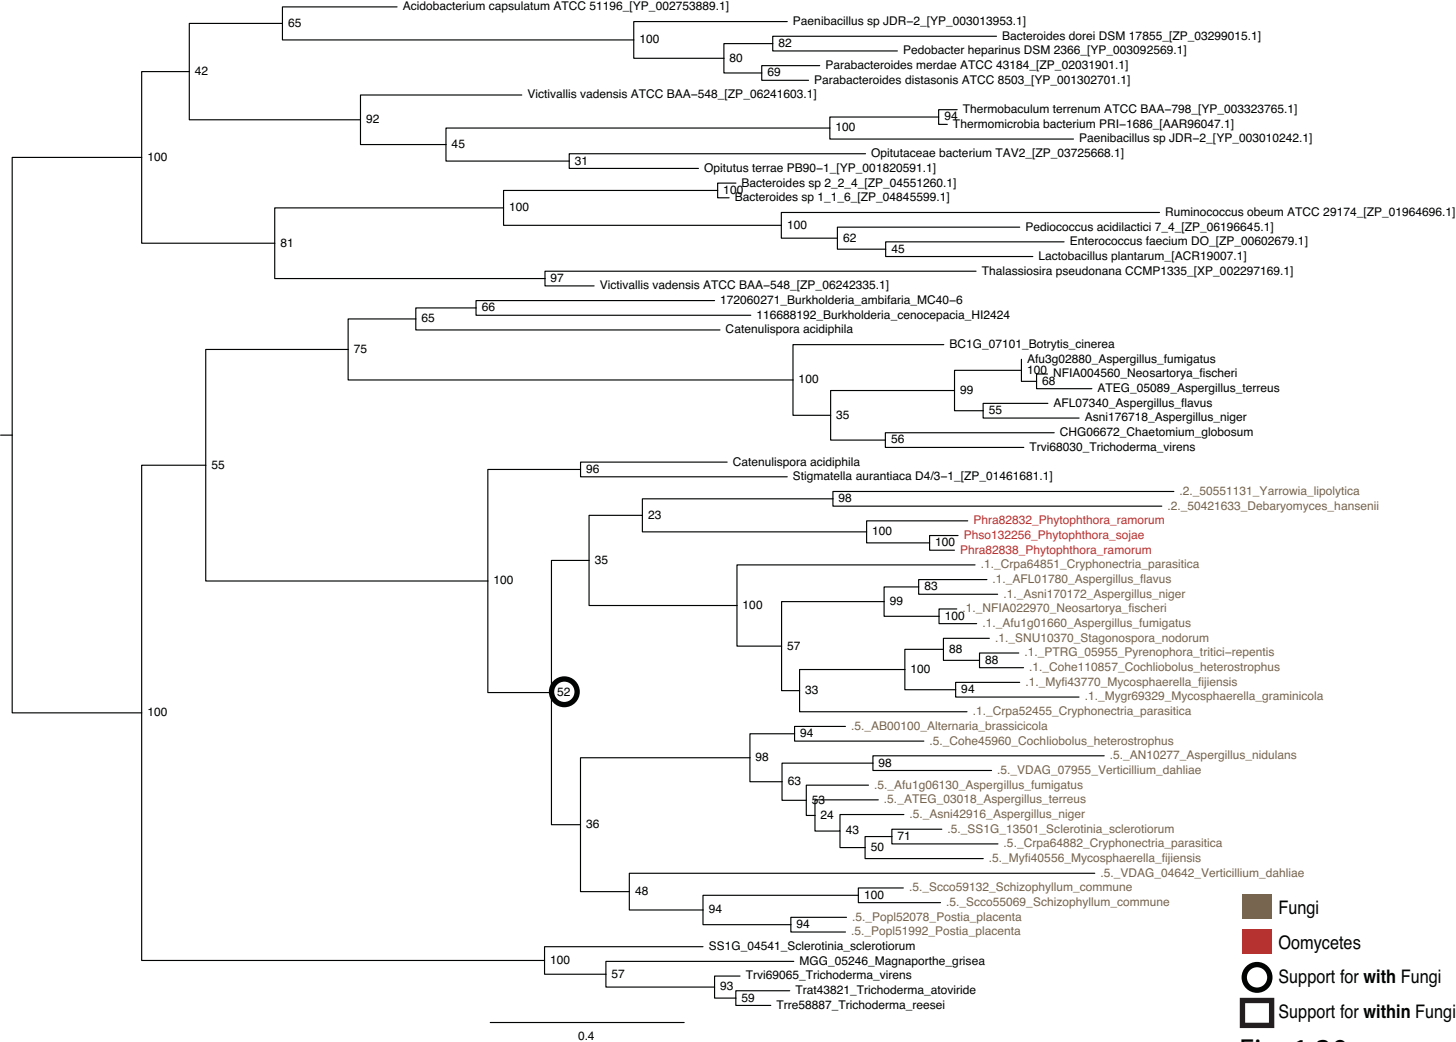

Fig. 1.30
